# Supplementary material
Source: PubMed Central journal article supplement (PMC4191039)

## Supplementary Figures

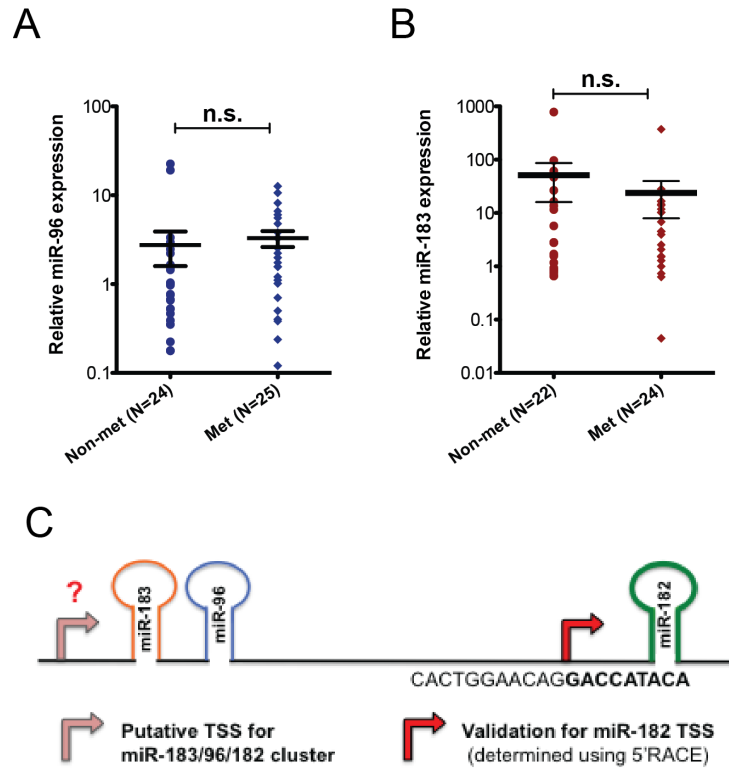

**Supplementary Figure 1. miR-96 and miR-183 are not elevated in metastatic sarcomas. (A&B)** No change in miR-96 and miR-183 expression in primary mouse STS was observed, measured by real time RT-PCR. **(C)** 5' RACE identified an independent promoter that drives miR-182 expression. All data are mean  $\pm$  SEM.

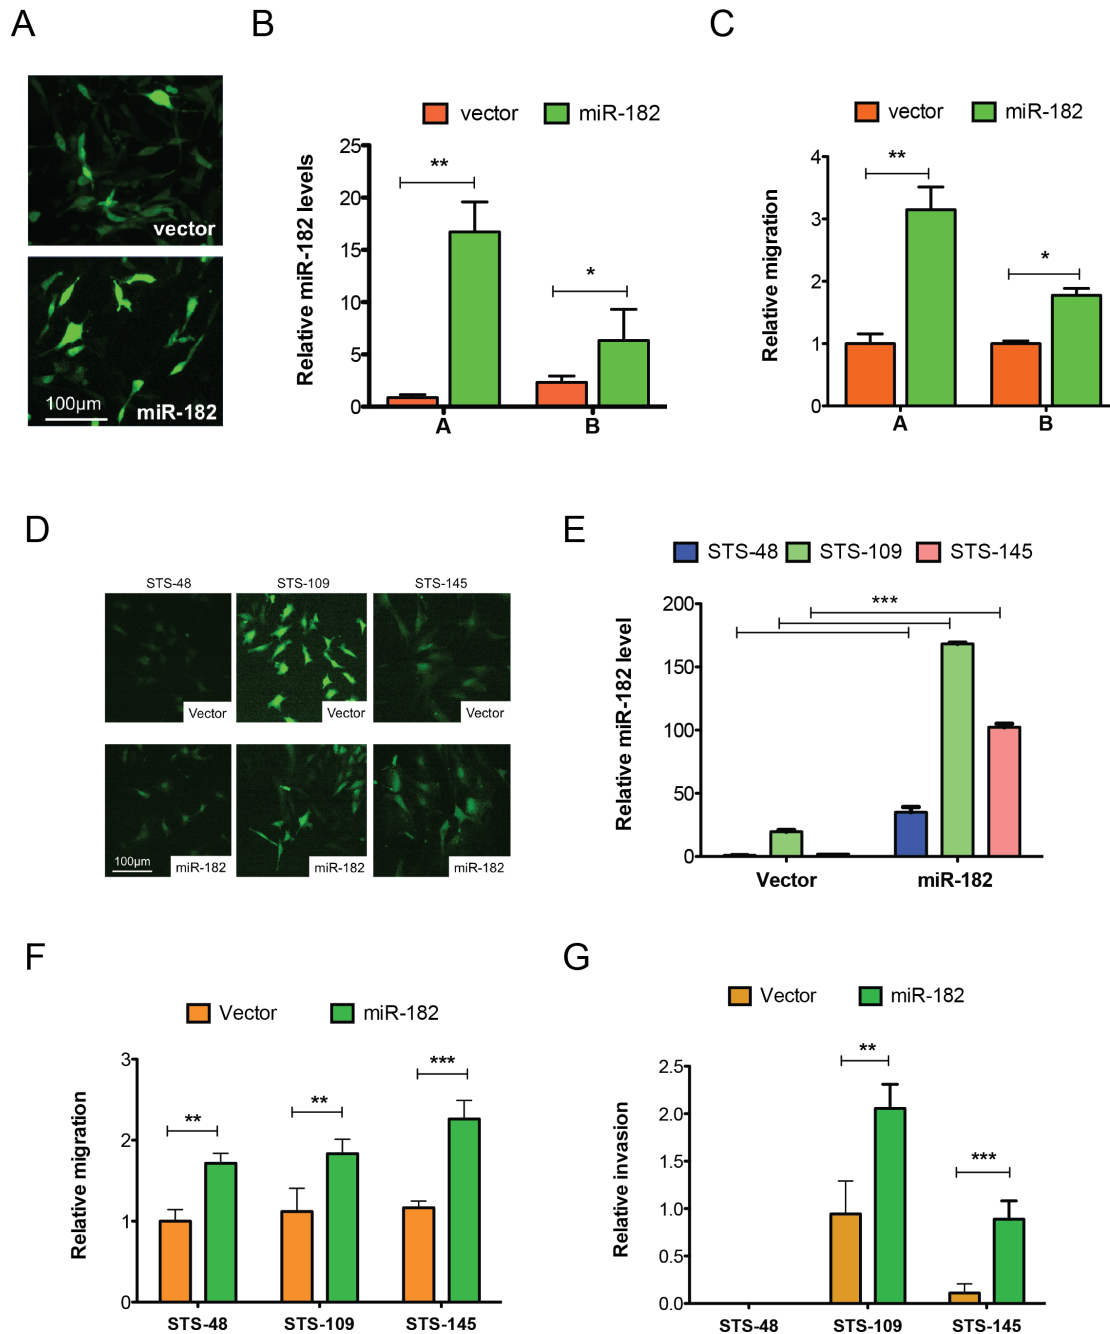

**Supplementary Figure 2. miR-182 promotes cell migration and invasion of human sarcoma cells.** (A) Image showing stably transduced sarcoma cell line expressing copGFP ± miR-182. (B) Real-time PCR confirming ectopic expression of stably transduced miR-182. (C) Overexpression of miR-182 increases migration in Transwell migration assay (n=3 independent experiments). (D) Images showing stably transduced human sarcoma cell lines expressing copGFP ± miR-182. (E) Real time RT-PCR validates overexpression of miR-182 in all human sarcoma cell lines compared to vector controls. (F) Overexpression of miR-182 increases migration and (G) invasion (n=6).

Two-way ANOVA is used for statistical analysis followed by Bonferroni post-hoc tests. All data are mean  $\pm$  SEM. Scale bars: 100  $\mu$ m (A and D). \*P<0.05, \*\*P<0.01, \*\*\*P<0.005.

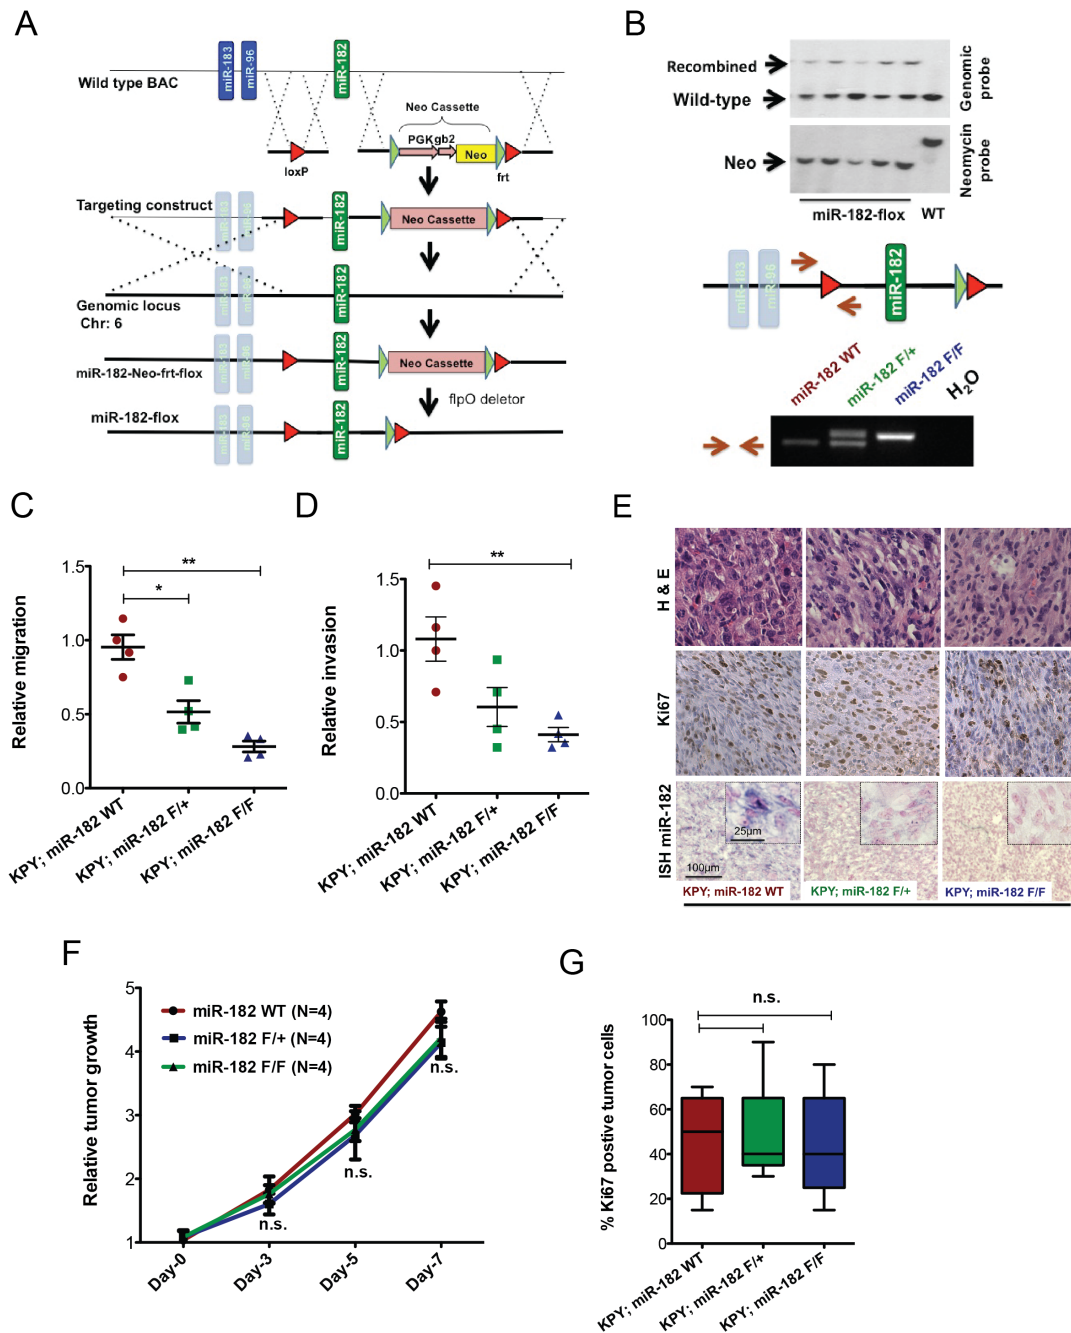

**Supplementary Figure 3. Generation and validation of miR-182 conditional knockout mice.** (A) Schematic of targeting constructs to generate genetically engineered mice with conditional knockout miR-182 (miR-182-flox). (B) Southern blot shows recombination of knock-in allele in ES cells (Top panel) and genotyping of mice demonstrates germline transmission of one or two copies of miR-182-flox allele (Bottom panel). (C & D) Quantification of Transwell migration assay and Matrigel invasion assay reveals that deletion of either one or two copies of miR-182 is sufficient to suppress migration and invasion of the cells (Four independent cell lines from each genotype were included for C & D. All of the experiments were performed in triplicate). (E) Top

*panel*: Hematoxylin & Eosin (H & E) staining demonstrates that the deletion of miR-182 does not affect sarcoma histology. *Middle panel*: Ki67 staining suggests no significant change in proliferation of cells among different genotypes. *Bottom panel*: *ISH* detects lower miR-182 expression in primary sarcomas from KPY; miR-182-flox mice. **(F)** No change in tumor growth kinetics is observed with miR-182 deletion. **(G)** Quantification of Ki67 staining. Two-tailed student's t-test and One-way ANOVA, followed by Bonferroni post-hoc tests, is used for statistical analysis. All data are mean  $\pm$  SEM. \*P<0.05, \*\*P<0.01. Scale bars: 100  $\mu$ m in E; 25  $\mu$ m (E, insets).

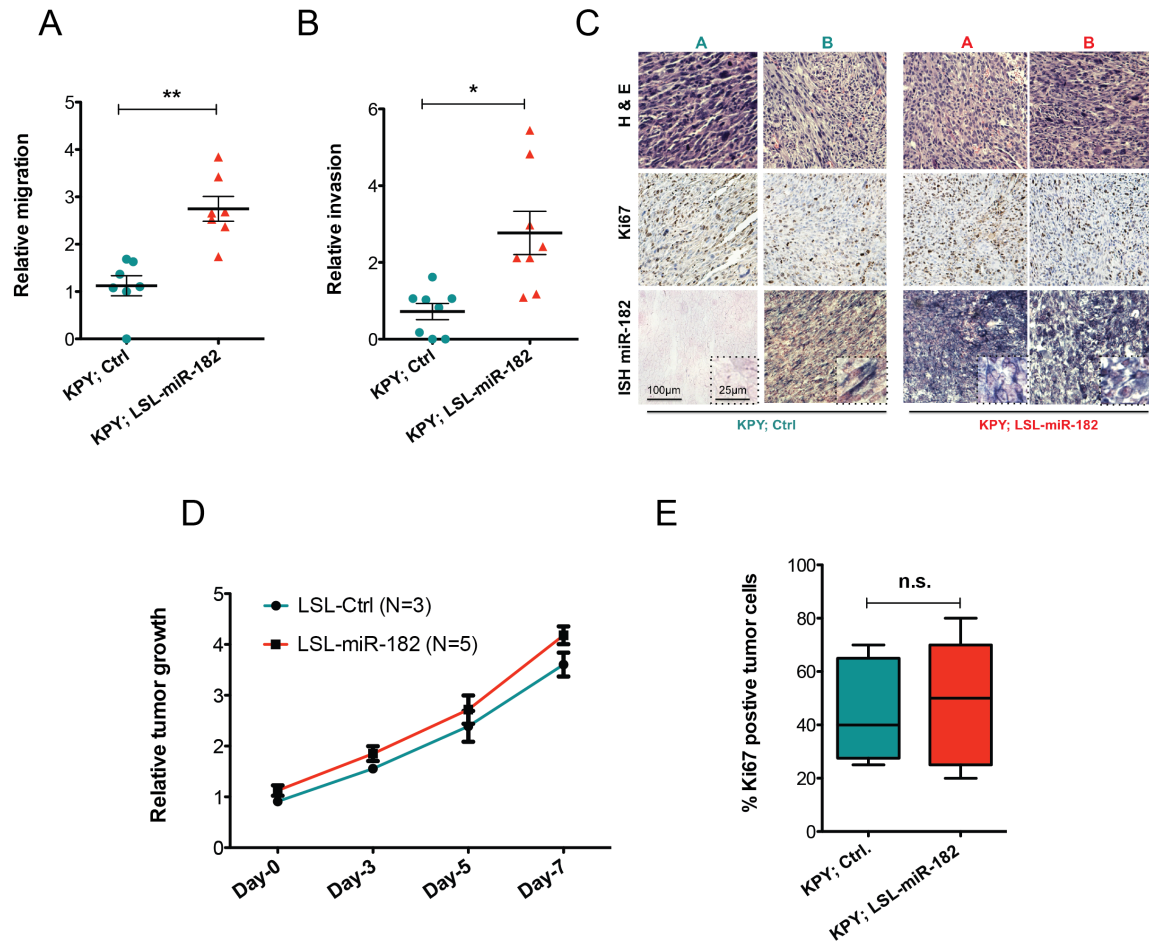

**Supplementary Figure 4. miR-182 overexpression enhances cell migration and invasion of primary mouse sarcoma cells.** (A) Quantification of Transwell migration assay and (B) Matrigel invasion assay shows that overexpression of miR-182 is sufficient to increase both migration and invasion of the primary sarcoma cells, respectively (n=8). (C) *Top panel:* Hematoxylin & Eosin (H & E) staining demonstrates that the overexpression of miR-182 does not affect sarcoma histology. *Middle panel:* Ki67 staining suggests no significant change in proliferation of cells among different genotypes. *Bottom panel:* ISH detects higher miR-182 expression in primary sarcomas from KPY; LSL-miR-182 mice. (D) No difference in tumor growth kinetics is observed with miR-182 overexpression. (E) Quantification of Ki67 staining. Student's t-test and One-way ANOVA is used for statistical analysis. All data are mean ± SEM. \*P<0.05, \*\*P<0.01. Scale bars: 100 μm in C; 25 μm (C, insets).

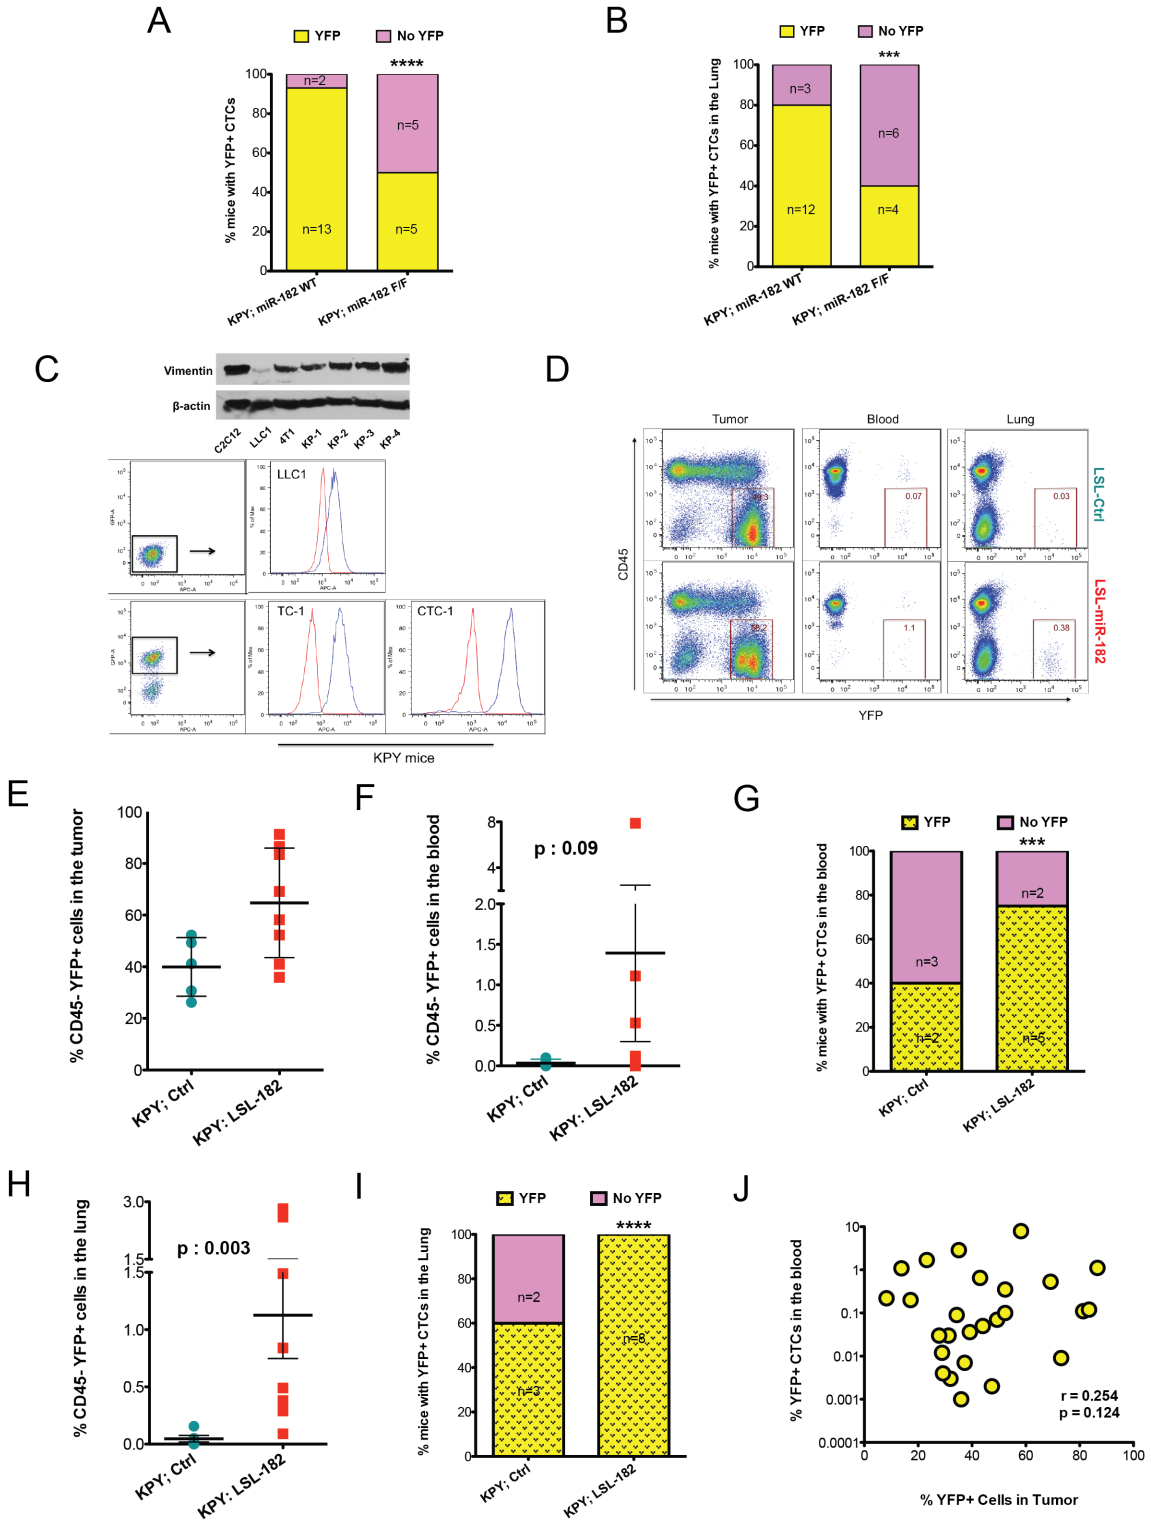

**Supplementary Figure 5. miR-182 controls both intravasation and extravasation of sarcoma cells. (A & B)** Quantification of CD45- YFP+ cells within the blood and lung between the two genotypes. **(C)** *Upper panel*: Western blot detects vimentin expression in primary mouse KP sarcoma cells lines (Numbered KP-1 through 4). C2C12: mouse

myoblast, LLC1: Lewis lung carcinoma and 4T1: mouse breast carcinoma cell line. *Lower panel:* Flow cytometry showing YFP+ primary KP cells (TC-1) and CTCs (CTC-1) are positive for vimentin (APC-labelled). *Red histogram:* IgG isotype and *Blue histogram:* vimentin staining. **(D)** Flow cytometry showing number of YFP+ cells in the tumor, blood and lung after miR-182 overexpression. **(E)** Quantification of CD45- YFP+ cells in primary tumors between the two genotypes. **(F,G,H & I)** Quantification of CD45- YFP+ cells within the blood and the lungs between the two genotypes (N=8). **(J)** No correlation is observed between the percentage of CD45- YFP+ cells in the tumor and CTCs. Two-tailed student's t-test and Fisher's exact test were used for statistical analysis. All data are mean  $\pm$  SEM \*P<0.05, \*\*\*P<0.005



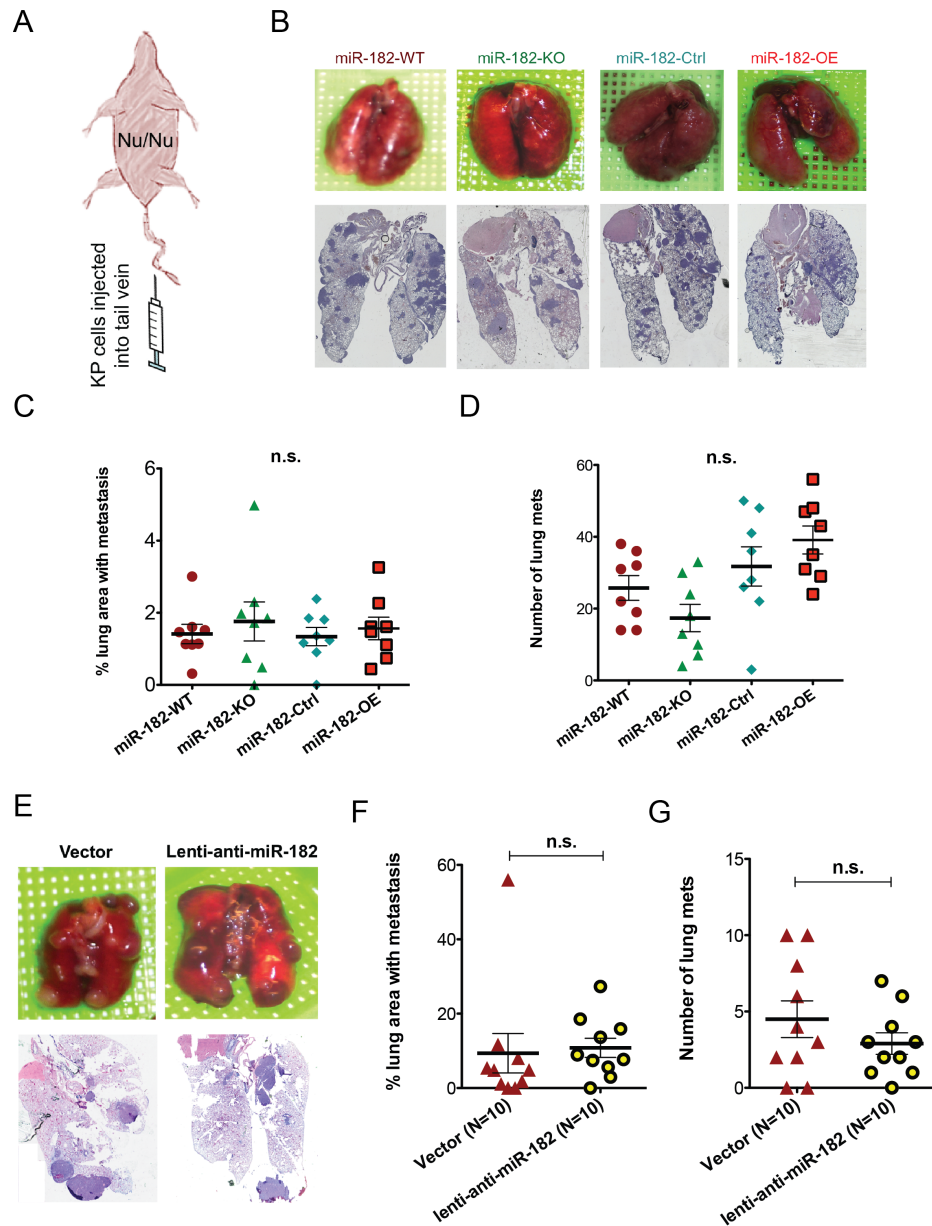

**Supplementary Figure 6. miR-182 does not affect lung colonization following tail vein injections.** (A) Schematic showing experimental metastasis assay. (B) Gross lung images (Top) and lung histology (Bottom) showing metastatic nodules among different genotypes. (C) Quantification of the number of lung metastases and (D) percentage of lung area with metastasis revealed no significant difference among different genotypes in an experimental metastasis assay. (E) Gross lung images (Top) and lung histology (Bottom) showing metastatic nodules between vector and lenti-anti-miR-182. (F) Quantification of the number of lung metastases and (G) percentage of lung area with metastasis revealed no significant difference between the two genotypes. Notably, the same sarcoma cell line with stable miR-182 knockdown showed a significant difference

in both the number of lung metastases and percentage of lung area with metastasis when injected orthotopically in mice (Refer to Fig 2). One-way ANOVA and two-tailed student's t-test is used for statistical analysis. All data are mean  $\pm$  SEM. Magnification: All lungs were scanned with a 2.5X objective using Leica DM5500B microscope.

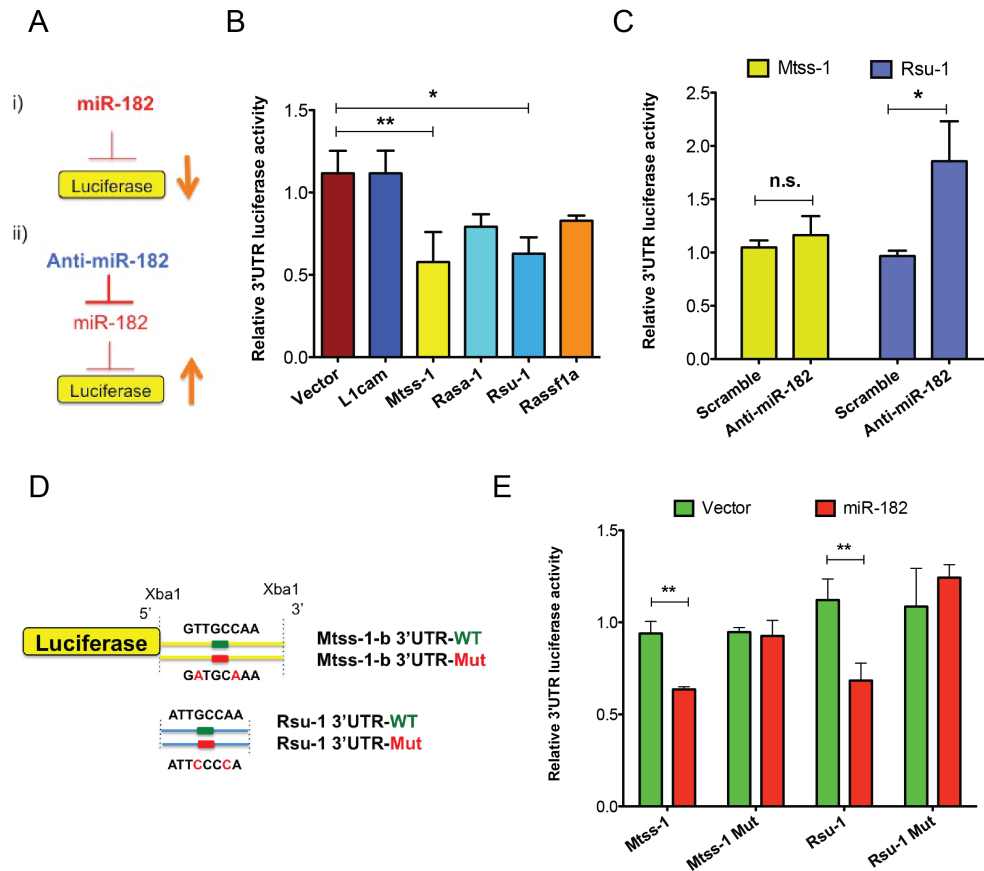

**Supplementary Figure 7. *In silico* / 3'UTR luciferase screens predict Rsu-1 and Mtss-1 as miR-182 targets.** (A) Schematic shows the principle of the luciferase reporter assay. (B) Luciferase assay shows decreased luciferase reporter activity of Rsu-1 and Mtss1 with miR-182 overexpression and (C) increased expression with miR-182 knockdown in HEK-293T cells (n=3). (D) Schematic showing alignment of Mtss-1 and Rsu-1 3'UTR binding motif with miR-182. Wild-type binding motifs (Green) are mutated to red sequences. (E) Luciferase assay shows no suppressive effect for mutant UTR clones with miR-182 overexpression. One-way ANOVA (B) and two-way ANOVA (C&E) were used for statistical analysis. All data are mean  $\pm$  SEM. \*P<0.05, \*\*P<0.01.

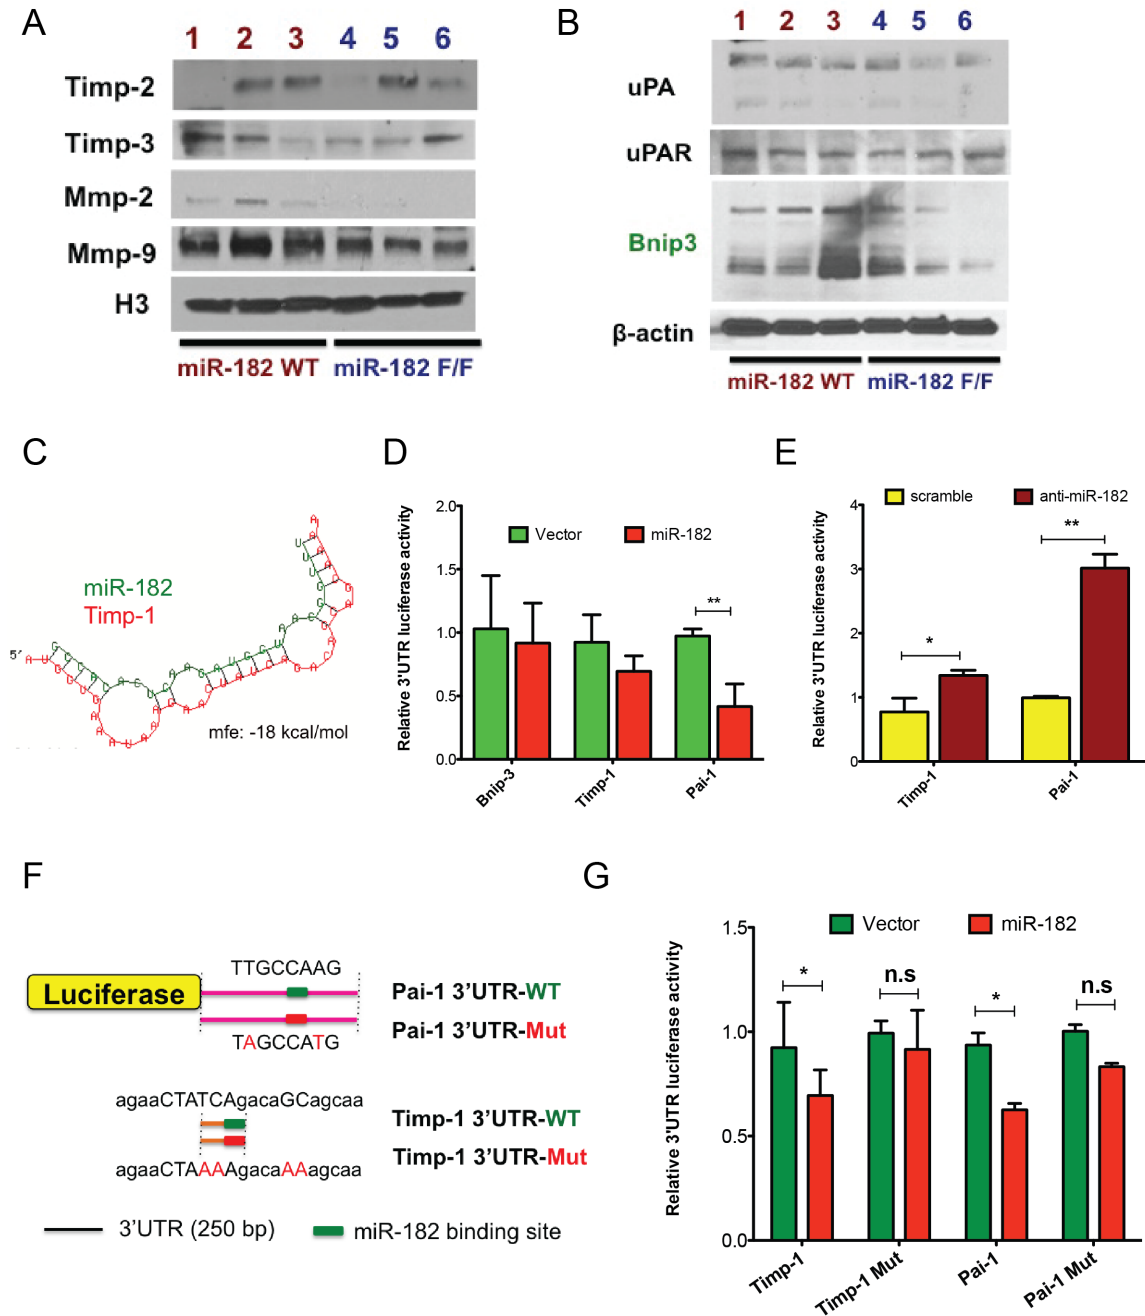

**Supplementary Figure 8. Luciferase reporter assay confirms Pai-1 and Timp-1 as direct targets of miR-182.** (A) No change in Timp-2, Timp-3 and MMP-9 proteins was observed, yet activated MMP-2 was decreased in miR-182 deleted cells. Timp-2 and Timp-3 are of interest because they have a miR-182 binding site in their 3'UTRs. (B) No change in endogenous uPA and uPAR proteins were seen in miR-182 deleted cells. uPAR was assessed because it interacts with both uPA and Pai-1. Despite being upregulated 3.5 fold in the proteomic screen, Bnip-3 is not validated as a miR-182 target by western blotting. (C) A weak miR-182 binding site on Timp-1 3'UTR is predicted by

*RNA-Hybrid* database. Interestingly, *RNA-Hybrid* predicted couple of miR-182 binding sites in 5'UTR and exon of Timp-1 (data not shown). **(D)** Luciferase assay shows decreased luciferase reporter activity of both Pai-1 and Timp-1 with miR-182 overexpression while **(E)** increased luciferase reporter activity with miR-182 knockdown. *Targetscan* predicts one miR-182 binding site each in Bnip-3 and Pai-1 3'UTRs, however does not predict any canonical binding site for miR-182 in the Timp-1 3'UTR. **(F)** Schematic showing alignment of Pai-1 and Timp-1 3'UTR binding motif with miR-182. Wild-type motifs (Green) are mutated to red sequences, respectively. **(G)** Luciferase assay shows no significant suppressive effect for mutant UTR clones with miR-182 overexpression. Two-way ANOVA was used for statistical analysis. All data are mean  $\pm$  SEM \*P<0.05, \*\*P<0.01.

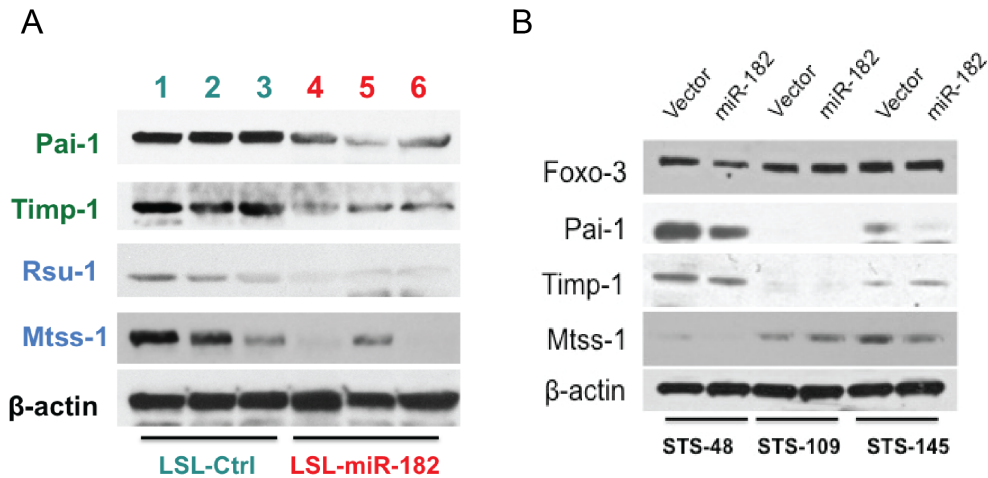

**Supplementary Figure 9. miR-182 targets Pai-1, Timp-1, and Mtss-1 in human sarcoma cell lines.** (A) Western blot validates downregulation of miR-182 targets Pai-1, Timp-1, Rsu-1 and Mtss-1 in primary cell lines derived from sarcomas miR-182 overexpressor mice and (B) in miR-182 overexpressing human sarcoma cell lines. Notably, Pai-1 and Timp-1 are undetectable in human cell line STS-109, which expresses 20-fold higher miR-182 than STS-48 and STS-145 (Supplementary Figure 2A). This further supports miR-182 regulation of Pai-1 and Timp-1. Rsu-1 was not detected in the human samples with the available antibody.

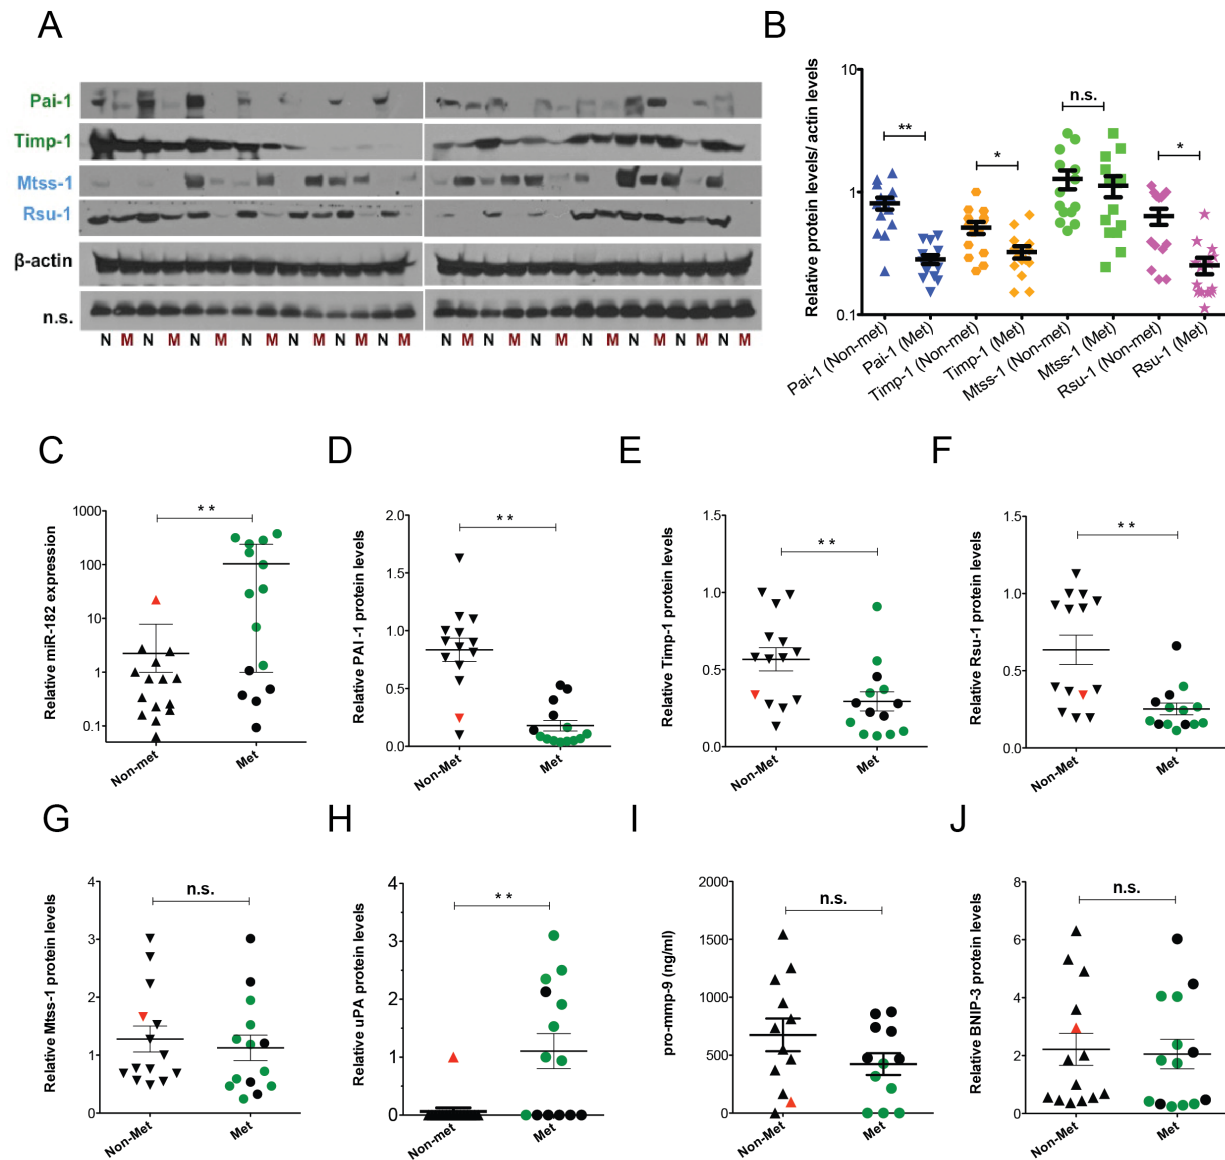

**Supplementary Figure 10. Expression of proteases is elevated in primary mouse metastatic sarcomas.** (A) Western blot performed on cell lysates from primary sarcomas with both metastatic (M) and non-metastatic (N) outcome having wild-type miR-182. (B) Quantification of western blot in A. (C-I) Graphs show differential mRNA expression of miR-182 and protein expression of Pai-1, Timp-1, Rsu-1 and Mtss-1 in metastatic and non-metastatic sarcomas. The metastatic sarcomas with high miR-182 expression are denoted in green circles and a single non-metastatic sarcoma with high miR-182 expression is denoted by a red triangle. These colored samples are followed through panels C-J to correlate miR-182 expression with the level of its targets. The Urokinase (uPA- H) and (I) pro-MMP-9 were detected using ELISA in primary metastatic KP sarcomas compared to non-metastatic sarcomas. (J) Quantification of western blot shows no difference in Bnip-3 protein, a miR-182 target predicted by *in silico* screen.

Two-tailed student's t-test was used for statistical analysis. All data are mean  $\pm$  SEM  
\*\*P<0.01.



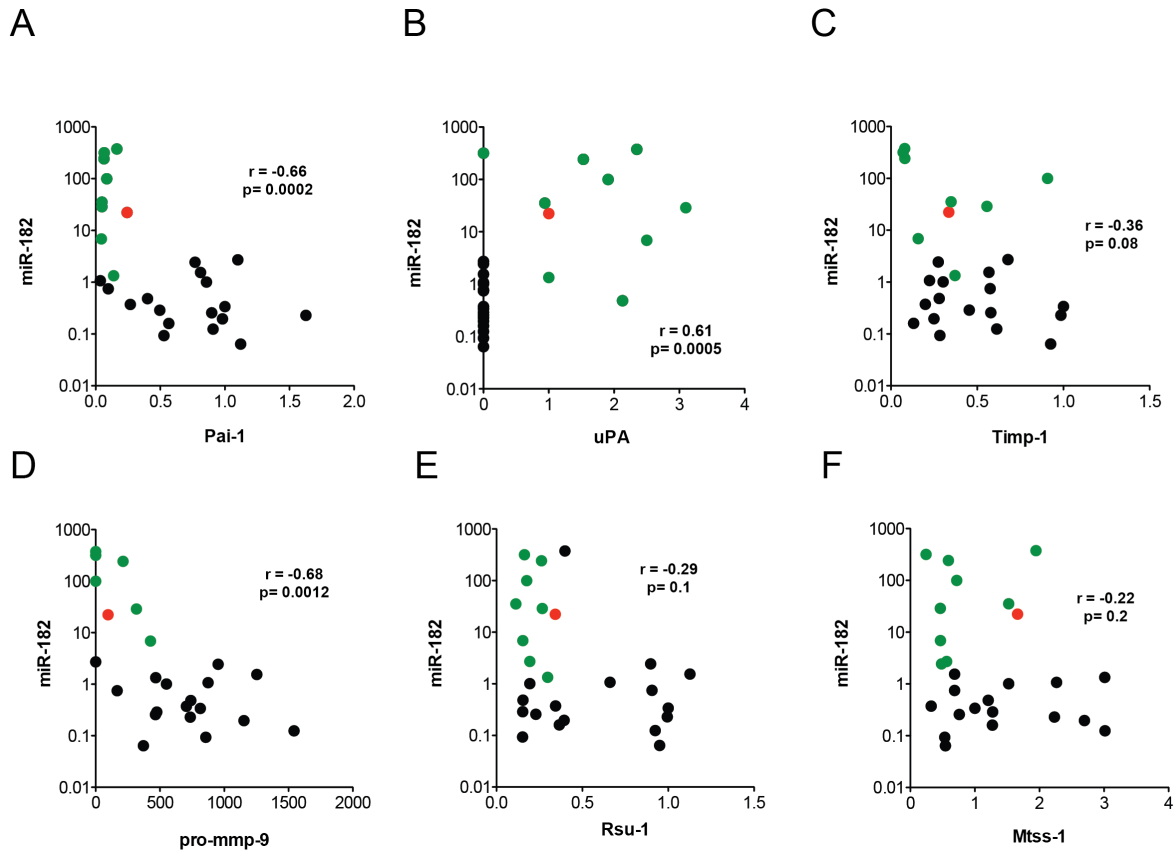

**Supplementary Figure 11. miR-182 expression correlates with protein expression of Pai-1, uPA, Timp-1, pro-MMP-9, Rsu-1 and Mtss-1 in primary mouse sarcomas.** (A, D, E & F) miR-182 levels negatively correlate with protein levels of its target genes such as Pai-1, Timp-1, Rsu-1 and Mtss-1 in primary sarcomas. (B) miR-182 levels positively correlates with the amount of urokinase (uPA) in primary sarcomas. (C) miR-182 levels also negatively correlate with protein levels of pro-MMP-9 within the primary sarcomas. Refer to figure 4 for designation of the color scheme. Spearman ( $r$ ) correlation test was used for statistical analysis.

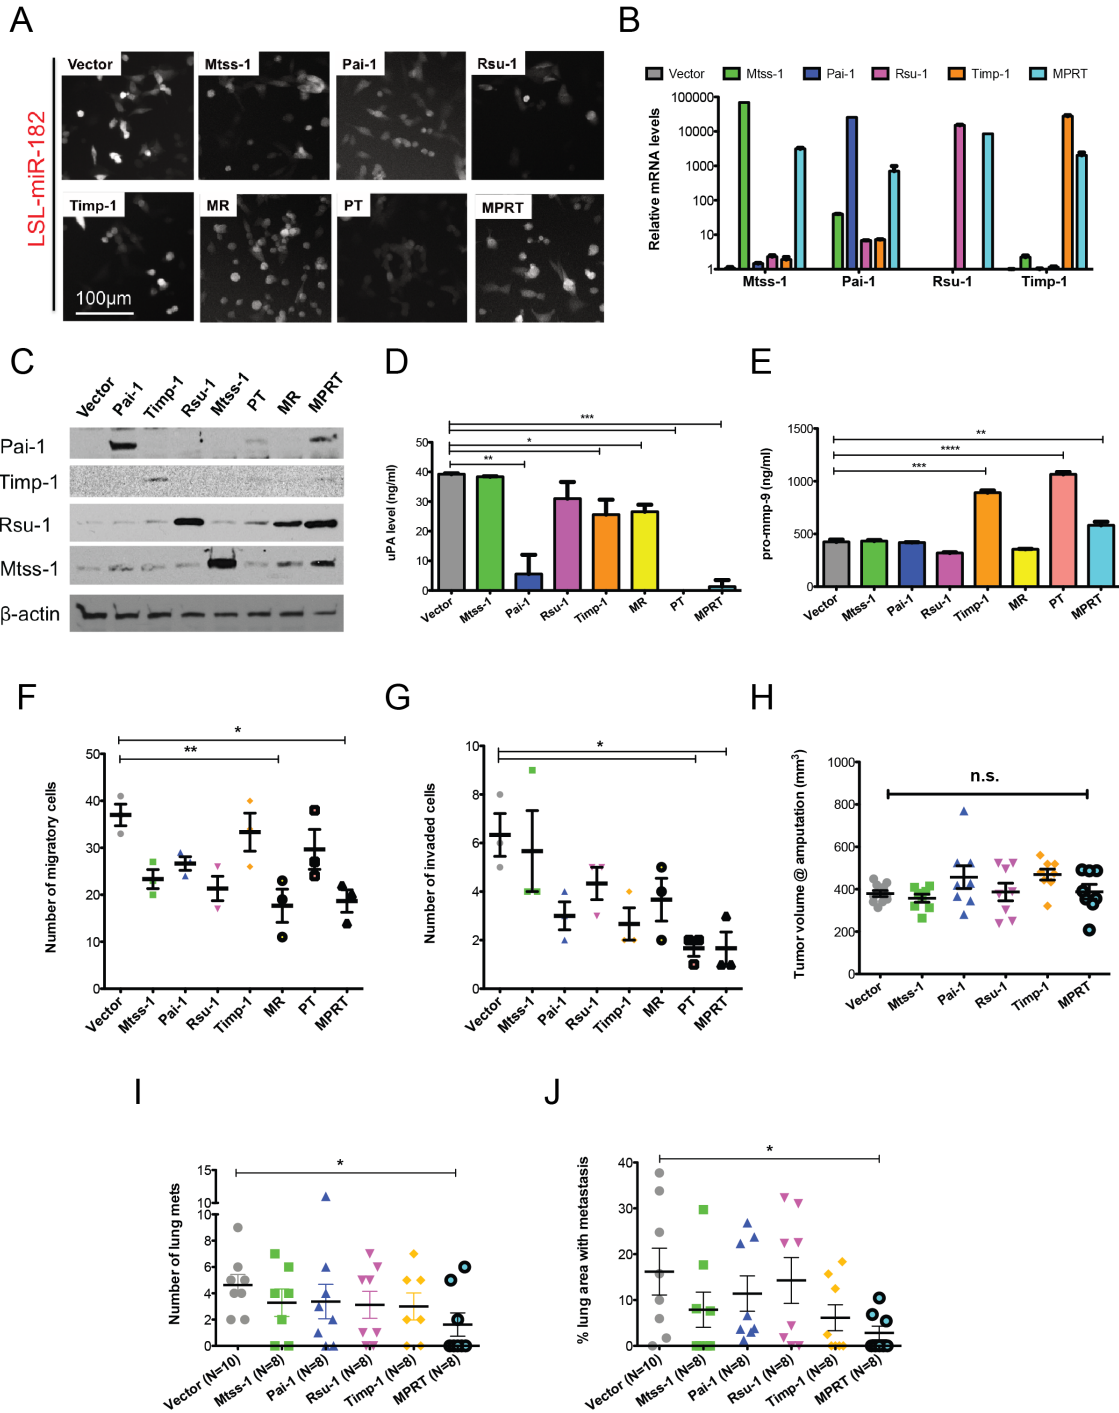

**Supplementary Figure 12. Generation and characterization of primary KP; LSL-miR-182 cell line ectopically expressing miR-182 targets. (A)** Images showing stably transduced KP; LSL-miR-182 cell line expressing copGFP ± either Mtss-1, Pai-1, Rsu-1, Timp-1, Mtss-1 and Rsu-1 (MR), Pai-1 and Timp-1 (PT) or in combination (MPRT). **(B & C)** Real-time PCR and western blot confirming ectopic expression of stably transduced

target genes either alone or in combination, respectively. **(D & E)** ELISA confirming significant modulation of uPA and pro-MMP-9 in the Pai-1 and Timp-1 transduced cells. **(F)** Effects of overexpression of Mtss-1, Pai-1, Rsu-1, Timp-1, MR, PT or MPRT on migration and **(G)** invasion of primary KP; LSL-miR-182 cells, as assessed by Transwell migration assay and Matrigel invasion assay, respectively. **(H)** Stable overexpression of Mtss-1, Pai-1, Rsu-1, Timp-1, or MPRT does not affect orthotopic tumor growth in nude mice. I, H & E stained lung sections showing metastatic nodules among the different genotype. **(J)** Quantification of the number of lung metastases and percentage of lung area with metastasis **(K)** among different genotypes. Two-tailed student's t-test and one-way ANOVA were used for statistical analysis. All data are mean  $\pm$  SEM. Scale bars: 100  $\mu$ m (A). \*P<0.05, \*\*P<0.01.

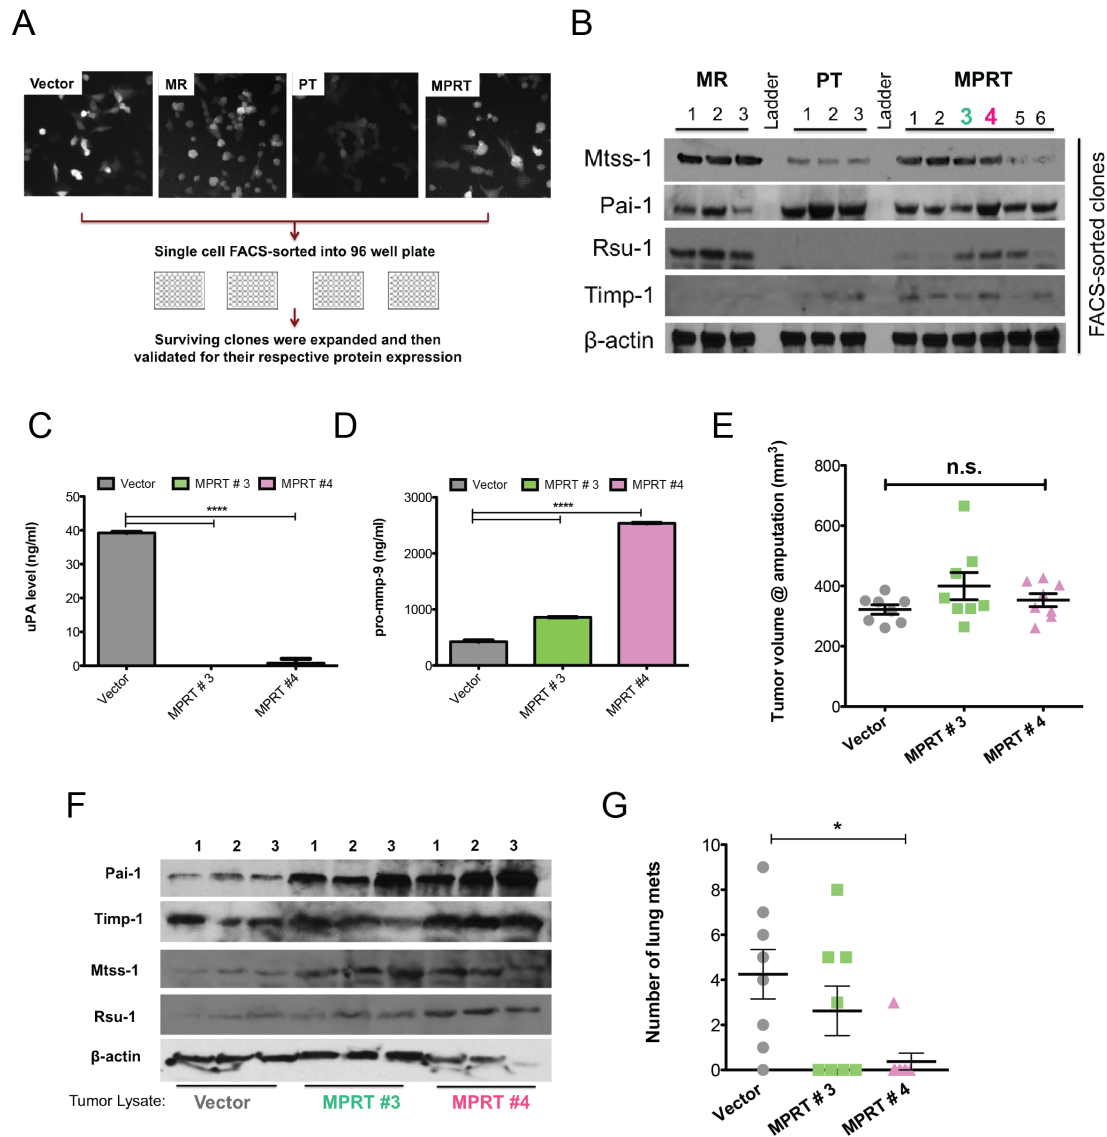

**Supplementary Figure 13. Selection and characterization of primary KP; LSL-miR-182 cell line expressing all four miR-182 targets.** (A) Strategy used to select cells expressing all four targets derived from a single cell clone. (B) Western blot confirming ectopic expression of stably transduced target genes in different selected clones. Clones MPRT #3 and MPRT #4 were selected for further experiments. Note: MPRT #4 expresses stable expression of all four targets, but MPRT #3 has weak expression of Timp-1. (C) ELISA confirming significant modulation of uPA and pro-MMP-9 (D) in both clones MPRT #3 and MPRT #4. (E) Stable overexpression of MPRT does not affect orthotopic tumor growth in nude mice. (F) Western blot performed on cell lysates from orthotopic sarcomas confirms overexpression of target genes in both clones MPRT #3 and MPRT #4. (G) Quantification of the number of lung metastases among different clones. One-way ANOVA were used for statistical analysis. All data are mean  $\pm$  SEM \* $P < 0.05$ .

**Supplementary Table 1.** List of differentially expressed miRNAs between non-metastatic versus metastatic primary mouse sarcomas using miRNA TLDA-array. (Blue color: low expression; Red color: high expression)

| microRNA | Fold- | p-value |
|----------|-------|---------|
|----------|-------|---------|

|                | <b>change</b> |          |
|----------------|---------------|----------|
| mmu-miR-741    | 0.12          | 0.030545 |
| mmu-miR-369-5p | 0.14          | 0.001025 |
| mmu-miR-511    | 0.22          | 0.00845  |
| mmu-miR-433    | 0.24          | 0.003165 |
| mmu-miR-667    | 0.24          | 0.005346 |
| mmu-miR-135a   | 0.25          | 0.018575 |
| mmu-miR-489    | 0.3           | 0.004304 |
| mmu-miR-323-3p | 0.33          | 0.016233 |
| mmu-miR-493    | 0.33          | 0.019341 |
| mmu-miR-134    | 0.34          | 0.002491 |
| mmu-miR-141    | 0.34          | 0.010273 |
| mmu-miR-431    | 0.34          | 0.038702 |
| mmu-miR-672    | 0.36          | 0.017806 |
| mmu-miR-367    | 0.36          | 0.038439 |
| mmu-miR-544    | 0.37          | 0.040212 |
| mmu-miR-434-3p | 0.38          | 0.000398 |
| mmu-miR-376a   | 0.39          | 0.019064 |
| mmu-miR-409-3p | 0.4           | 0.021962 |
| mmu-miR-495    | 0.41          | 0.02367  |
| mmu-miR-539    | 0.42          | 0.01817  |
| mmu-miR-337-5p | 0.42          | 0.028233 |
| mmu-miR-331-5p | 0.48          | 0.040726 |
| mmu-miR-410    | 0.49          | 0.041912 |
| mmu-miR-136    | 0.51          | 0.02367  |
| mmu-miR-411    | 0.51          | 0.026027 |
| mmu-miR-223    | 0.55          | 0.002796 |
| mmu-miR-574-3p | 0.55          | 0.007661 |
| mmu-miR-193b   | 0.56          | 0.006263 |
| mmu-miR-126-3p | 0.59          | 0.000508 |
| mmu-miR-126-5p | 0.63          | 0.027828 |
| mmu-miR-340-3p | 0.68          | 0.017297 |
| mmu-miR-145    | 0.68          | 0.023448 |
| mmu-miR-16     | 0.72          | 0.017728 |
| mmu-miR-26a    | 0.77          | 0.027147 |
| mmu-miR-30d    | 0.77          | 0.03994  |
| mmu-miR-532-5p | 1.7           | 0.018311 |
| mmu-miR-532-3p | 1.71          | 0.008108 |
| mmu-miR-182    | 2.02          | 0.028035 |
| mmu-miR-677    | 2.05          | 0.047643 |
| rno-miR-351    | 3.1           | 0.025377 |
| mmu-miR-147    | 3.3           | 0.013841 |
| mmu-miR-96     | 3.42          | 0.019771 |

**Supplementary Table 2.** List of differentially expressed proteins between miR-182 WT and miR-182 deleted primary sarcoma cells from a proteomic screen. Only proteins with a change of 2 fold or more are included in this list.

| <b>Table A. Upregulated proteins in miR-182 F/F versus miR-182 WT (Greater than 2-folds change)</b> |                      |                              |                |
|-----------------------------------------------------------------------------------------------------|----------------------|------------------------------|----------------|
| <b>Protein Description</b>                                                                          | <b>Peptide Count</b> | <b>Fold-change KO versus</b> | <b>P-value</b> |

|                                                                                   |    | WT   |          |
|-----------------------------------------------------------------------------------|----|------|----------|
| ref NP_064330.2 microsomal glutathione S-transferase 1                            | 2  | 19.1 | 0.004    |
| ref NP_032897.2 plasminogen activator inhibitor 1 precursor                       | 3  | 12.9 | 0.024    |
| ref NP_001191839.1 uncharacterized protein LOC226691                              | 7  | 12.5 | 0.005    |
| ref NP_056598.2 ubiquitin-like protein ISG15 precursor                            | 4  | 12.5 | 0.002    |
| ref NP_032620.2 lactadherin isoform 1 precursor                                   | 5  | 9.7  | 0.021    |
| ref NP_783327.2 alpha-2-macroglobulin-P precursor                                 | 2  | 9.2  | 0.023    |
| ref NP_034510.3 H-2 class I histocompatibility antigen, L-D alpha chain precursor | 7  | 9.1  | 2.69E-04 |
| ref NP_201571.2 solute carrier organic anion transporter family member 2A1        | 3  | 8.5  | 0.003    |
| ref NP_034858.2 protein-lysine 6-oxidase precursor                                | 4  | 8.3  | 0.004    |
| ref NP_075615.2 ras-related protein Rab-8A                                        | 5  | 8.0  | 0.021    |
| ref NP_034459.2 podoplanin precursor                                              | 2  | 7.7  | 0.006    |
| ref NP_035767.4 three prime repair exonuclease 1                                  | 3  | 7.6  | 0.002    |
| ref NP_032352.1 immunity-related GTPase family M protein 1                        | 6  | 7.1  | 0.001    |
| ref NP_035723.2 metalloproteinase inhibitor 1 precursor                           | 5  | 6.3  | 6.23E-04 |
| ref NP_598567.2 UDP-N-acetylhexosamine pyrophosphorylase                          | 2  | 6.2  | 0.021    |
| ref NP_032018.2 fibulin-2 isoform a precursor                                     | 2  | 6.1  | 0.034    |
| ref NP_033408.1 thy-1 membrane glycoprotein preproprotein                         | 4  | 5.6  | 0.049    |
| ref NP_035231.2 protein kinase C alpha type                                       | 2  | 5.6  | 0.023    |
| ref NP_075630.2 torsin-3A precursor                                               | 5  | 5.5  | 0.011    |
| ref NP_064335.1 signal peptidase complex catalytic subunit SEC11A                 | 4  | 5.1  | 0.021    |
| ref NP_035328.2 prostaglandin G/H synthase 2 precursor                            | 18 | 4.9  | 0.006    |
| ref NP_080831.2 reticulocalbin-3 precursor                                        | 9  | 4.7  | 0.006    |
| ref NP_058044.1 peroxiredoxin-4 precursor                                         | 11 | 4.6  | 0.01     |
| ref NP_077160.1 glutathione peroxidase 7 precursor                                | 3  | 4.5  | 0.004    |
| ref NP_032357.2 interferon-induced protein with tetratricopeptide repeats 1       | 14 | 4.3  | 7.91E-04 |
| ref NP_034390.1 interferon-induced guanylate-binding protein 2                    | 6  | 4.2  | 8.49E-05 |
| ref NP_776147.1 apolipoprotein L 9a                                               | 3  | 4.0  | 0.015    |
| ref NP_034460.3 embigin precursor                                                 | 2  | 3.9  | 0.03     |
| ref NP_061208.3 interferon gamma induced GTPase                                   | 7  | 3.8  | 0.001    |
| ref NP_071301.2 protein Niban                                                     | 2  | 3.8  | 0.025    |
| ref NP_067482.4 sulfide:quinone oxidoreductase, mitochondrial                     | 10 | 3.7  | 0.006    |
| ref NP_035148.1 sequestosome-1                                                    | 5  | 3.7  | 0.01     |
| ref NP_001152773.1 galectin-9 isoform 2                                           | 2  | 3.6  | 0.006    |
| ref NP_035642.1 surfeit locus protein 4                                           | 4  | 3.6  | 0.007    |
| ref NP_033404.1 thrombomodulin precursor                                          | 3  | 3.5  | 0.005    |



|                                                                              |    |     |          |
|------------------------------------------------------------------------------|----|-----|----------|
| ref NP_001139780.1 drebrin-like protein isoform 1                            | 3  | 3.5 | 4.00E-04 |
| ref NP_035161.2 prolyl 4-hydroxylase subunit alpha-2 isoform 2 precursor     | 13 | 3.2 | 0.015    |
| ref NP_034631.1 interferon-induced protein with tetratricopeptide repeats 3  | 6  | 3.2 | 0.001    |
| ref NP_075638.2 cytosolic non-specific dipeptidase                           | 6  | 3.1 | 0.011    |
| ref NP_062757.2 prolyl 3-hydroxylase 1 isoform 2 precursor                   | 2  | 3.0 | 0.01     |
| ref NP_001239582.1 extracellular matrix protein 1 isoform 2 precursor        | 7  | 3.0 | 0.01     |
| ref NP_080073.1 cytochrome b5                                                | 5  | 2.9 | 0.003    |
| ref NP_031817.1 cysteine and glycine-rich protein 1                          | 5  | 2.9 | 0.049    |
| ref NP_001087235.1 myeloid-associated differentiation marker                 | 3  | 2.9 | 0.008    |
| ref NP_031568.2 biglycan precursor                                           | 9  | 2.8 | 0.017    |
| ref NP_598890.1 pre-mRNA-processing factor 19 isoform 2                      | 9  | 2.8 | 0.04     |
| sp P02769.4 ALBU_BOVIN Serum albumin                                         | 43 | 2.8 | 0.008    |
| ref NP_001153490.1 torsin-1A-interacting protein 1 isoform 1                 | 8  | 2.8 | 0.018    |
| ref NP_112462.1 A-kinase anchor protein 12                                   | 6  | 2.7 | 0.01     |
| ref NP_035907.1 zyxin                                                        | 3  | 2.7 | 0.027    |
| ref NP_032355.2 interferon-activable protein 204                             | 17 | 2.7 | 9.23E-04 |
| ref NP_112444.1 interleukin-1 receptor antagonist protein isoform 1          | 2  | 2.7 | 0.05     |
| ref NP_033492.1 UDP-glucose 6-dehydrogenase                                  | 17 | 2.6 | 0.025    |
| ref NP_082571.1 protein disulfide-isomerase A5 precursor                     | 6  | 2.6 | 1.50E-06 |
| ref NP_035280.1 galectin-3-binding protein precursor                         | 11 | 2.5 | 0.02     |
| ref NP_001020773.1 interleukin-1 receptor-like 1 isoform a precursor         | 5  | 2.5 | 0.012    |
| ref NP_034342.1 four and a half LIM domains protein 2                        | 4  | 2.5 | 0.044    |
| ref NP_038791.2 transducin beta-like protein 2 precursor                     | 2  | 2.5 | 0.039    |
| ref NP_001177903.1 tyrosine-protein kinase receptor UFO isoform 2 precursor  | 3  | 2.5 | 0.018    |
| ref NP_035205.1 multidrug resistance protein 1B                              | 7  | 2.5 | 0.012    |
| ref NP_660210.1 2'-5'-oligoadenylate synthase-like protein 1                 | 11 | 2.5 | 0.027    |
| ref NP_032575.2 alpha-mannosidase 2                                          | 12 | 2.4 | 0.004    |
| ref NP_835188.2 protein PML isoform 2                                        | 2  | 2.4 | 0.011    |
| ref NP_032652.3 C-type mannose receptor 2 precursor                          | 3  | 2.4 | 0.036    |
| ref NP_001164324.1 myeloid cell nuclear differentiation antigen-like protein | 4  | 2.4 | 0.033    |
| ref NP_034572.1 heme oxygenase 1                                             | 5  | 2.4 | 0.025    |
| ref NP_001152954.1 ras-related protein Rab-34                                | 2  | 2.3 | 0.033    |
| ref NP_473384.1 RNA-binding protein Musashi homolog 2 isoform 1              | 2  | 2.3 | 0.046    |
| ref NP_038660.1 purine nucleoside phosphorylase                              | 4  | 2.3 | 0.042    |
| ref NP_035160.1 prolyl 4-hydroxylase subunit alpha-1 precursor               | 21 | 2.3 | 0.005    |
| ref NP_808385.2 uncharacterized protein LOC239673                            | 3  | 2.3 | 0.012    |
| ref NP_001104513.1 serpin H1 precursor                                       | 25 | 2.3 | 8.69E-   |

|                                                                                    |    |     |          |
|------------------------------------------------------------------------------------|----|-----|----------|
|                                                                                    |    |     | 04       |
| ref NP_031505.1 ADP-ribosylation factor 4                                          | 7  | 2.2 | 0.015    |
| ref NP_848713.1 transgelin-2                                                       | 12 | 2.2 | 0.022    |
| ref NP_663550.1 caldesmon 1                                                        | 27 | 2.2 | 0.012    |
| ref NP_031670.1 lysosome membrane protein 2 precursor                              | 2  | 2.2 | 0.042    |
| ref NP_766431.3 torsin-1A-interacting protein 2 isoform b                          | 3  | 2.1 | 0.042    |
| ref NP_001139646.1 ran GTPase-activating protein 1                                 | 14 | 2.1 | 0.023    |
| ref NP_766415.1 leucyl-cystinyl aminopeptidase                                     | 6  | 2.1 | 0.039    |
| ref NP_033127.1 ras-related protein R-Ras precursor                                | 2  | 2.1 | 0.006    |
| ref NP_032436.1 integral membrane protein 2B                                       | 4  | 2.1 | 0.019    |
| ref NP_062782.2 PDZ and LIM domain protein 5 isoform ENH1                          | 7  | 2.1 | 0.021    |
| ref NP_149064.1 keratin, type II cytoskeletal 7                                    | 3  | 2.1 | 0.006    |
| ref NP_058077.2 syntaxin-7                                                         | 5  | 2.0 | 0.026    |
| ref NP_038588.2 heat shock protein beta-1                                          | 3  | 2.0 | 2.34E-04 |
| ref NP_001177187.1 ribosomal protein S27-like                                      | 2  | 2.0 | 0.032    |
| ref NP_001017959.1 lysosome-associated membrane glycoprotein 2 isoform 1 precursor | 6  | 2.0 | 0.002    |
| ref NP_058060.2 integrin beta-3 precursor                                          | 2  | 2.0 | 0.036    |
| ref NP_001123951.1 nucleobindin-2 precursor                                        | 6  | 2.0 | 0.006    |

**Table B. Downregulated proteins in miR-182 F/F versus miR-182 WT (Greater than 2-folds change)**

| <b>Protein Description</b>                                                                 | <b>Peptide Count</b> | <b>Fold-change KO versus WT</b> | <b>P-value</b> |
|--------------------------------------------------------------------------------------------|----------------------|---------------------------------|----------------|
| ref NP_776291.1 alanine aminotransferase 2                                                 | 2                    | -6.2                            | 0.007          |
| ref NP_038593.1 integrin alpha-3 precursor                                                 | 3                    | -5.9                            | 2.30E-04       |
| ref NP_075541.1 something about silencing protein 10                                       | 2                    | -3.9                            | 0.043          |
| ref NP_032563.2 alpha-methylacyl-CoA racemase                                              | 2                    | -3.6                            | 0.004          |
| ref NP_032278.1 high mobility group protein B2                                             | 3                    | -3.6                            | 0.001          |
| ref NP_001240686.1 acidic leucine-rich nuclear phosphoprotein 32 family member E isoform 2 | 2                    | -3.5                            | 0.011          |
| ref NP_083139.1 iron-sulfur cluster assembly 2 homolog, mitochondrial precursor            | 2                    | -3.4                            | 0.04           |
| ref NP_473411.2 AFG3-like protein 1                                                        | 2                    | -3.3                            | 0.047          |
| ref NP_598883.1 nurim                                                                      | 2                    | -3.2                            | 0.04           |
| ref NP_079829.1 39S ribosomal protein L11, mitochondrial                                   | 2                    | -3.1                            | 0.008          |
| ref NP_898850.2 insulin-like growth factor 2 mRNA-binding protein 2                        | 6                    | -2.8                            | 0.012          |
| ref XP_003945388.1 PREDICTED: high mobility group protein B1-like                          | 7                    | -2.6                            | 0.02           |
| ref NP_035351.1 transcriptional activator protein Pur-beta                                 | 4                    | -2.6                            | 0.022          |

|                                                                                                   |    |      |          |
|---------------------------------------------------------------------------------------------------|----|------|----------|
| ref NP_034937.1 MARCKS-related protein                                                            | 5  | -2.6 | 0.049    |
| ref NP_081551.2 pentatricopeptide repeat-containing protein 3, mitochondrial precursor            | 6  | -2.5 | 0.002    |
| ref NP_031650.3 chromobox protein homolog 3                                                       | 7  | -2.5 | 0.012    |
| ref NP_598768.1 CDGSH iron-sulfur domain-containing protein 1                                     | 2  | -2.4 | 0.027    |
| ref NP_080064.3 nucleus accumbens-associated protein 1                                            | 2  | -2.4 | 0.048    |
| ref NP_001164424.1 mRNA cap guanine-N7 methyltransferase isoform 2                                | 2  | -2.4 | 0.016    |
| ref NP_001074627.1 clustered mitochondria protein homolog                                         | 3  | -2.3 | 0.016    |
| ref NP_001074218.1 general transcription factor II-I isoform 5                                    | 7  | -2.3 | 0.008    |
| ref NP_001103686.1 chromobox protein homolog 5                                                    | 5  | -2.3 | 0.03     |
| ref NP_034038.2 N-acylneuraminate cytidyltransferase                                              | 2  | -2.2 | 0.022    |
| ref NP_766599.2 isocitrate dehydrogenase                                                          | 23 | -2.2 | 0.015    |
| ref NP_035932.2 ATP-dependent Clp protease ATP-binding subunit clpX-like, mitochondrial isoform 1 | 6  | -2.2 | 0.034    |
| ref NP_080665.1 polymerase delta-interacting protein 2                                            | 3  | -2.2 | 0.035    |
| ref NP_082359.1 chromatin assembly factor 1 subunit B                                             | 2  | -2.2 | 0.02     |
| ref NP_033788.3 aldose reductase                                                                  | 8  | -2.2 | 0.043    |
| ref NP_291096.2 FACT complex subunit SPT16                                                        | 7  | -2.2 | 0.04     |
| ref NP_081480.2 39S ribosomal protein L12, mitochondrial precursor                                | 4  | -2.1 | 0.021    |
| ref NP_031648.1 chromobox protein homolog 1                                                       | 3  | -2.1 | 4.86E-04 |
| ref NP_001116304.1 epidermal growth factor receptor substrate 15-like 1 isoform b                 | 2  | -2.1 | 0.017    |
| ref NP_080218.1 obg-like ATPase 1 isoform a                                                       | 4  | -2.1 | 0.013    |
| ref XP_920204.1 PREDICTED: ribosome biogenesis protein NSA2 homolog isoform 1                     | 2  | -2.1 | 0.043    |
| ref NP_776292.1 protein RCC2                                                                      | 15 | -2.1 | 0.01     |
| ref NP_919320.1 ribosome biogenesis protein BMS1 homolog                                          | 2  | -2.1 | 0.042    |
| ref NP_277068.1 ubiquilin-4                                                                       | 2  | -2.1 | 0.025    |
| ref NP_081278.1 DNA-directed RNA polymerase II subunit RPB4 isoform 1                             | 2  | -2.1 | 0.021    |
| ref NP_001186199.1 aldolase 1 A retrogene 1                                                       | 2  | -2.1 | 0.024    |
| ref NP_081710.1 regulation of nuclear pre-mRNA domain-containing protein 1B                       | 2  | -2.1 | 0.019    |

**Supplementary Table 3.** Genes upregulated in the proteomic screen that have miR-182 binding sites.

| Upregulated genes in the | Number of miR-182 | Investigated in the current | Previously reported as a |
|--------------------------|-------------------|-----------------------------|--------------------------|
|--------------------------|-------------------|-----------------------------|--------------------------|

| proteomic screen with a miR-182 binding motif | binding sites | study | miR-182 target |
|-----------------------------------------------|---------------|-------|----------------|
| Lamp-2                                        | 1             |       |                |
| Pai-1                                         | 1             | Yes   | No             |
| Timp-1                                        | 1             | Yes   | No             |
| Pdpn                                          | 1             |       |                |
| Fstl-1                                        | 1             |       |                |
| Pgs-1                                         | 1             |       |                |
| Bnip-3                                        | 1             | Yes   | No             |
| Arf-4                                         | 2             |       |                |
| *Rsu-1                                        | 1             | Yes   | No             |
| **Mtss-1                                      | 3             | Yes   | Yes            |

\* Rsu-1 was upregulated ~1.4 fold in the proteomic screen. \*\* Mtss-1 was not detected in proteomic screen.

**Supplementary Table 4.** Sequences of all the primers used in the study.

| Name             | Direction | Sequence             | Use        |
|------------------|-----------|----------------------|------------|
| miR-182-loxp-fwd | Forward   | CATCCCAGGGTCTGTGTGTC | Genotyping |
| miR-182-loxp-rev | Reverse   | CAGCATGAGTGTTTTATGAG | Genotyping |
| miR-182-4-rev    | Reverse   | GTCATCTGGAGCTGCGGCCT | Genotyping |

|                       |         |                                        |            |
|-----------------------|---------|----------------------------------------|------------|
| R26F2                 | Forward | CTCGGCTAGGTAGGGGATCG                   | Genotyping |
| D274                  | Forward | TTCGTGCAAGTTGAGTCCATC                  | Genotyping |
| L15                   | Reverse | TACGGGGTCATTAGTTCA                     | Genotyping |
| D229                  | Reverse | GCTCCTTTTACGCTATGTGG                   | Genotyping |
| miR-182-Fwd-Nsi1      | Forward | ATGCATGACCATACAGGCC GAAGGAC            | Cloning    |
| miR-182-Rev-Mlu1      | Reverse | ACGCGTCATCTGTCTCTCCCTC ACCAAG          | Cloning    |
| miR-182-pcdh-fwd      | Forward | CTAGAGCTAGCGAATTTCGACCATACAGGCCGAAG    | Cloning    |
| miR-182-pcdh-rev      | Reverse | CAGATCCTTGCGGCCGC CATCTGTCTCTCCCTC     | Cloning    |
| miR-96-pcdh-fwd       | Forward | CTAGAGCTAGCGAATTTCGTGTGACTCCTGTCTCTG   | Cloning    |
| miR-96-pcdh-rev       | Reverse | CAGATCCTTGCGGCCGCCCGCAAGCATCTCCATC     | Cloning    |
| Rsu-1-pcdh-fwd        | Forward | CTAGAGCTAGCGAATTCATGTCCAAGTCACTGAA     | Cloning    |
| Rsu-1-pcdh-rev        | Reverse | GCAGATCCTTGCGGCCGCTCATTTGTTCTTGGC      | Cloning    |
| Mtss-1-pcdh-fwd       | Forward | CTAGAGCTAGCGAATTCATGGAGGCTGTGATCGA     | Cloning    |
| Mtss-1-pcdh-rev       | Reverse | GCAGATCCTTGCGGCCGCCTAAGAGAAGCGCGG      | Cloning    |
| Rasa-1-3'utr-pgl3-    | Forward | GATCGCCGTGTAATTCTAGACAGCCTGTGTTCTG     | Cloning    |
| Rasa-1-3'utr-pgl3-    | Reverse | CCGGCCGCCCCGACTCTAGACCTTGATACAATA      | Cloning    |
| Rsu-1-3'utr-pgl3-fwd  | Forward | GAT CGC CGT GTA ATT CTA GAG AAC AAATGA | Cloning    |
| Rsu-1-3'utr-pgl3-rev  | Reverse | CCG GCC GCC CCG ACT CTA GAGTTA AAT GAA | Cloning    |
| Mtss-1-3'utr-pgl3-    | Forward | GAT CGC CGT GTA ATT CTA GACTGGTTC CCA  | Cloning    |
| Mtss-1-3'utr-pgl3-rev | Reverse | CCG GCC GCC CCG ACT CTA GACTTT ATT TAT | Cloning    |
| L1cam-3'utr-pgl3-     | Forward | GATCGCCGTGTAATTCTAGAGCAAGGTCCAGCCA     | Cloning    |
| L1cam -3'utr-pgl3-    | Reverse | CCGGCCGCCCCGACTCTAGACATTTCTAGGTTTT     | Cloning    |
| Rassf1a-3'utr-pgl3-   | Forward | GATCGCCGTGTAATTCTAGACAGTGCAAAG         | Cloning    |
| Rassf1a-3'utr-pgl3-   | Reverse | CCGGCCGCCCCGACTCTAGATGATGCCTGA         | Cloning    |
| Pai-1-3'utr-pgl3-fwd  | Forward | GATCGCCGTGTAATTCTAGACAGTGGGAAGAGAC     | Cloning    |
| Pai-1-3'utr-pgl3-rev  | Reverse | CCGGCCGCCCCGACTCTAGAGTTTGCATATTCTC     | Cloning    |
| Timp-1-3'utr-pgl3-    | Forward | GATCGCCGTGTAATTCTAGAGACCTGAAGCCTTC     | Cloning    |
| Timp-1-3'utr-pgl3-    | Reverse | CCGGCCGCCCCGACTCTAGAGCTGCTGTCTGAT      | Cloning    |
| Timp-2-3'utr-pgl3-    | Forward | GATCGCCGTGTAATTCTAGAGAAGGCTGACAGAG     | Cloning    |
| Timp-2-3'utr-pgl3-    | Reverse | CCGGCCGCCCCGACTCTAGAGAAGAGTGGCTGT      | Cloning    |
| Bnip-3-3'utr-pgl3-    | Forward | GATCGCCGTGTAATTCTAGAGATGAAGATTTGGA     | Cloning    |
| Bnip-3-3'utr-pgl3-rev | Reverse | CCGGCCGCCCCGACTCTAGACACCTATTGACTAT     | Cloning    |
| Mtss-1-mut-fwd        | Forward | GTTAATATAAACTGATGCAAAATTCAATGTAG       | Cloning    |
| Mtss-1-mut-rev        | Reverse | CTACATTGAATTTGCATCAGTTTATATTAAC        | Cloning    |
| Rsu-1-mut-fwd         | Forward | GTTTCCTTAAATTCCTCAAGGCAGAAAAC          | Cloning    |
| Rsu-1-mut-rev         | Reverse | GTTTTCTGCCTTGGGGAATTTTAAGGAAAC         | Cloning    |
| Pai-1-mut-fwd         | Forward | CCTTAGGGACCTAGCCATGGTGTGCTTGG          | Cloning    |
| Pai-1-mut-rev         | Reverse | CCAAGCATCACCATGGCTAGGTCCCTAAGG         | Cloning    |
| Timp-1-mut-fwd        | Forward | GGTGAAATAAAGAATAAAAGACAAAAGCAA         | Cloning    |
| Timp-1-mut-rev        | Reverse | TTTGCTTTTGTCTTTTAGTTCTTTATTTACC        | Cloning    |

**Supplementary Table 5.** Description of antibodies used in the study.

| <b>Antibody (Ab)</b> | <b>Manufacturer</b> | <b>Primary<br/>Ab<br/>dilution</b> | <b>Secondary<br/>Ab (dilution)</b> | <b>Application</b> |
|----------------------|---------------------|------------------------------------|------------------------------------|--------------------|
|----------------------|---------------------|------------------------------------|------------------------------------|--------------------|

|                  |                           |                              |                                |                                    |
|------------------|---------------------------|------------------------------|--------------------------------|------------------------------------|
| Pai-1            | Cell Signaling Technology | 1:1000                       | Rabbit (1:5000)                | Western blotting                   |
| Timp-1           | Pierce                    | 1:2000                       | Mouse (1:5000)                 | Western blotting                   |
| Timp-2           | Abcam                     | 1:500                        | Rabbit (1:5000)                | Western blotting                   |
| Timp-3           | Abcam                     | 1:500                        | Rabbit (1:5000)                | Western blotting                   |
| Rsu-1            | Sigma                     | 1:2000                       | Rabbit (1:5000)                | Western blotting                   |
| Mtss-1           | Cell Signaling Technology | 1:2000                       | Rabbit (1:5000)                | Western blotting                   |
| uPA              | Abcam                     | 1:500                        | Rabbit (1:5000)                | Western blotting                   |
| uPAR             | R & D sciences            | 1:500                        | Mouse (1:5000)                 | Western blotting                   |
| MMP-2            | Cell Signaling Technology | 1:2000                       | Rabbit (1:5000)                | Western blotting                   |
| MMP-9            | Sigma                     | 1:2000                       | Mouse (1:5000)                 | Western blotting                   |
| Bnip-3           | Cell Signaling Technology | 1:2000                       | Rabbit (1:5000)                | Western blotting                   |
| Foxo-3           | Epitomics                 | 1:2000                       | Rabbit (1:5000)                | Western blotting                   |
| $\beta$ -actin   | BD sciences               | 1:5000                       | Mouse (1:10000)                | Western blotting                   |
| $\beta$ -catenin | Cell Signaling Technology | 1:5000                       | Mouse (1:10000)                | Western blotting                   |
| H3               | Cell Signaling Technology | 1:5000                       | Rabbit (1:10000)               | Western blotting                   |
| Digoxin-AP       | R & D sciences            | 1:500                        | Rabbit (1:500)                 | In situ hybridization              |
| Ki67             | BD sciences               | 1:500                        | Rabbit (1:1000)                | Immunohistochemistry               |
| Foxo-1           | Cell Signaling Technology | 1:2000                       | Rabbit (1:5000)                | Western blotting                   |
| Vimentin         | Cell Signaling Technology | 1:1000<br>WB and<br>1:100 FC | Rabbit (1:5000 WB and 1:200 F) | Western blotting<br>Flow cytometry |

**Supplementary Table 6:** A significant negative correlation between miR-182 and Pai-1 or Rsu-1 (Spearman (r) correlation test was used for statistical analysis)

|  | <b>Spearman Correlation (r)</b> | <b>P-value</b> |
|--|---------------------------------|----------------|
|--|---------------------------------|----------------|

|                 |       |        |
|-----------------|-------|--------|
| miR-182 & Pai-1 | -0.41 | 0.031  |
| miR-182 & Rsu-1 | -0.64 | 0.0005 |

## **Supplementary Methods**

### **Migration & Invasion assay**

The 24-Multiwell FluoroBlok Insert System, with a 24-well plate and lid and pore size of 8.0  $\mu\text{m}$  (BD Biosciences, San Jose, CA) was used to determine the effect of



overexpressed miRNAs on migration and invasiveness per the manufacturer's protocol. Infected cells were serum starved overnight, trypsinized the next day, resuspended in serum free medium and then transferred to the hydrated matrigel chambers (~25,000 cells/well). The chambers were then incubated for 24 hrs in DMEM supplemented with 10% FBS in the bottom chambers before examination. The cells on the upper surface were scraped and washed away while the invaded cells on the lower surface were stained with Calcein AM dye for 1h at 37°C. Finally, invaded cells were counted under a microscope, and the relative number was calculated. All the fluorescence images were taken with 10X objective using Zeiss Axiovert 25 microscope.

### **Flow cytometry of YFP<sup>+</sup> CTCs**

KPY; miR-182 F/F or miR-182 WT control mice with sarcoma were anesthetized. Peripheral blood was collected from the inferior vena cava (IVC) and then mixed with PBS containing 5 mM EDTA. Red blood cells (RBCs) were separated from peripheral blood mononuclear cells (PB-MNCs) using Ficoll-Plaque (GE) according to the manufacturer's instructions. In addition, primary tumors and lungs were digested using collagenase, dispase and trypsin for a minimum of one hour. The digested mixture/slurry was then filtered using a 70-micron filter followed by RBC lysis using ACK buffer (Lonza, Walkersville, MD) according to the manufacturer's protocol. PB-MNCs and cells from tumor & lung were stained with phycoerythrin (PE)-conjugated anti-mouse CD45 IgG (eBioscience) and 7AAD (BD Pharmingen). Data were collected from at least 30,000 PB-MNCs by FACSCanto (BD Pharmingen) and analyzed by Flowjo software (Tree Star, Inc). Statistical significance between two groups was determined by Mann-Whitney test.

### **Luciferase assay**

293T cells were seeded in triplicate in 12-well plates and transfected with different luciferase reporters and Renilla luciferase using the Lipofectamine transfection reagent (Invitrogen) per the manufacturer's protocol. The cells were harvested 24 h later, and a luciferase assay was performed according to the manufacturer's protocol (Promega). Renilla luciferase activity was used as an internal control for transfection efficiency.

### **Western blotting**

Cultured cells or primary tumors were harvested using RIPA lysis buffer and proteins were extracted. The protein concentration was determined using a BCA protein assay kit (Pierce, Thermo Scientific) and samples were separated in SDS polyacrylamide gels (4-20% gradient concentrations) from Bio-Rad (Hercules, CA). After blocking the membrane with 10% milk for one hour, the membrane was probed with a primary antibody (Supplementary Table 4) overnight and subsequently incubated with an HRP-conjugated secondary antibody for one hour. Working solutions of the Pierce ECL Substrate was then added to the membrane for 4 minutes. The membrane was exposed to Thermo Scientific CL-XPosure Film and developed using an X-ray film developer.

After converting X-ray films to computer files, the bands were quantified using *ImageJ* software.

### **Enzyme linked Immunosorbent assay (ELISA)**

Serum-free supernatant from overnight-cultured cells was collected or protein lysates were extracted from primary tumors. Protein concentration was determined using a BCA protein assay kit (Pierce, Thermo Scientific). 1ug of protein was taken for ELISA measurements for uPA and pro-MMP-9. The active uPA protein was determined using a commercially available ELISA Kit as per the manufacturer's protocol (Molecular innovations, MI). Relative absorbance was plotted onto a standard curve to quantify uPA protein. Pro-MMP-9 protein levels were quantified using an ELISA kit from R&D systems (Minneapolis, MN USA). The assay detects only the pro or inactive form of MMP-9, but not the active MMP-9. A standard curve was first plotted and Pro-MMP-9 protein levels were compared to the standard curve.

### **Experimental metastasis assays**

Male athymic nude (nu/nu) mice (ages 4–5 wk) were purchased from Taconic labs (NCRNU-M) and maintained in Duke University's accredited animal facility. To directly assess lung colonization, 100,000 exponentially growing KP-vector or KP-anti-miR-182 cells were injected into nude mice through the tail vein. Two weeks after injection, the animals were sacrificed. The lungs were harvested and fixed in 10% formalin solution, and both the number of tumor nodules and the area of lung with metastases were calculated.

### **Transduction**

The lentiviral vectors (System Biosciences) expressing miR-182, miR-96 or lenti-anti-miR-182 were packaged and used to infect KP cell lines. For in vivo rescue experiments, a sarcoma cell line overexpressing miR-182 from a KP; LSL-miR-182 mouse was infected with a lentivirus expressing a single target or a pool of all four viruses together (MPRT: Clones that express the combination of all four-target genes i.e. Mtss-1, Pai-1, Rsu-1 and Timp-1). Because cells infected with multiple viruses may not lead to overexpression of all four targets in every cell, we also subcloned the MPRT pooled cells by flow cytometry to identify single cell-derived clones that overexpressed all the four miR-182 targets by western blot. All the fluorescence images were taken with 10X objective using Zeiss Axiovert 25 microscope.

### **Real-time RT-PCR**

RNA from cell lines or the tumors was isolated with Trizol reagent (Invitrogen), according to the manufacturer's protocol. Reverse transcription for specific mature miRNAs was performed using the Taqman MicroRNAs Reverse Transcription kit followed by

quantitative PCR with their respective probes, per manufacturer's suggestion (Applied Biosystems, Foster City, CA.). Mature miRNA expression in mouse tumors was calculated using the delta-delta-CT method after normalization to SnoRNA202 expression. Pai-1, Timp-1, Rsu-1, Mtss-1 and Bnip-3 mRNA expression were measured using gene specific Taqman probes purchased from Applied Biosystems. Relative change was measured using the delta-delta-CT method after normalizing gene expression with Gapdh expression.

### **Northern blotting**

15-20 ug RNA from cell lines was separated in a 10% denaturing acrylamide gel purchased from (Bio-Rad, Hercules, CA). Separated RNA was then wet transferred onto the Nylon membrane (N+ Bond, GE Health sciences, Pittsburgh, PA). miR-182, miR-203 and U6 probes (Exiqon, MA) were labeled at the 5' end with radioactive <sup>32</sup>P using T4 PNK (New England Biolabs, MA) using the manufacturer's protocol and subsequently cleaned with a Microspin G-25 column (GE Health sciences, Pittsburg, PA). After UV cross-linking, the blot was pre-hybridized for 30 mins and then incubated with the radioactive probe overnight at 55 °C in a hybridization oven. Washing was performed the next day and the membrane was exposed to X-ray film in the dark at -80 °C for 2 hrs.

# Full unedited gel for Figure 2A

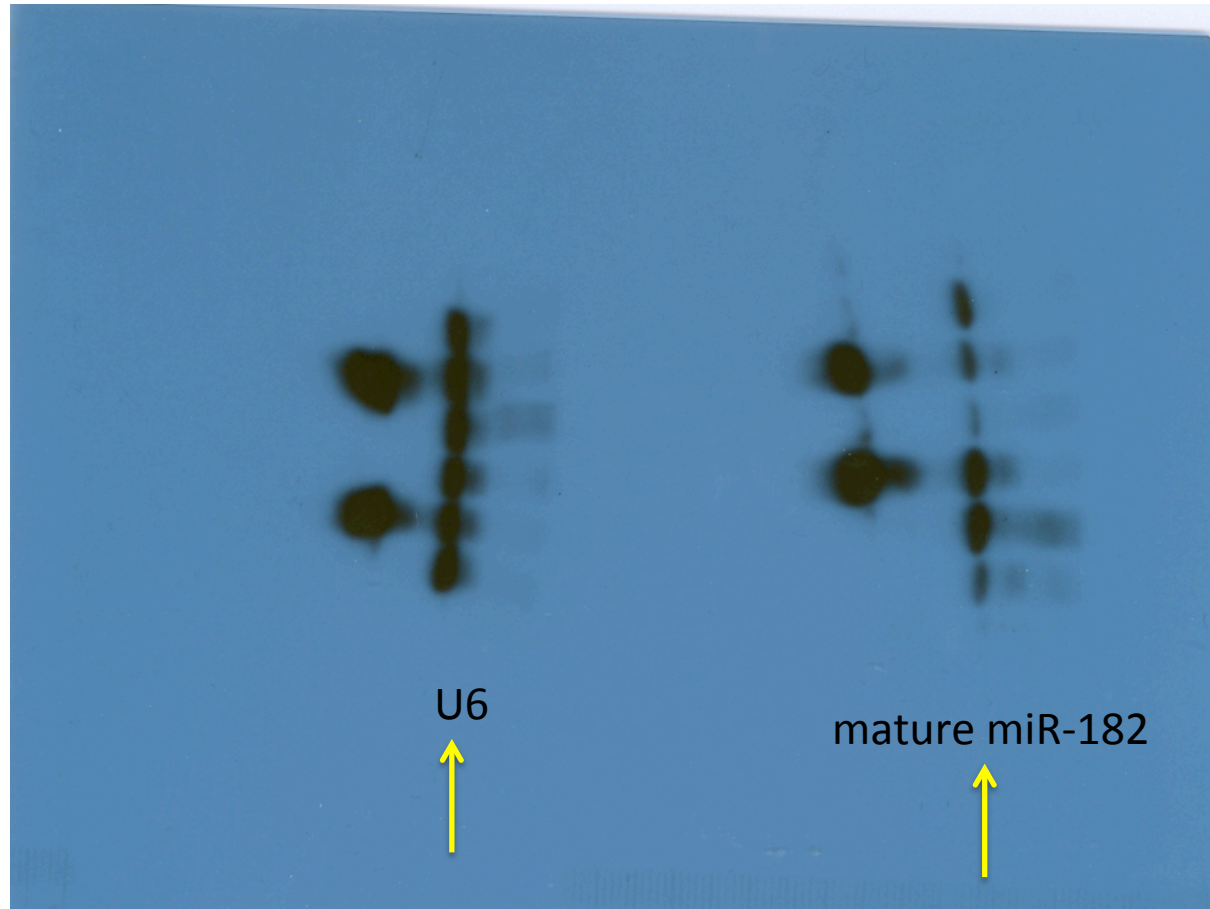

# Full unedited gel for Figure 2D

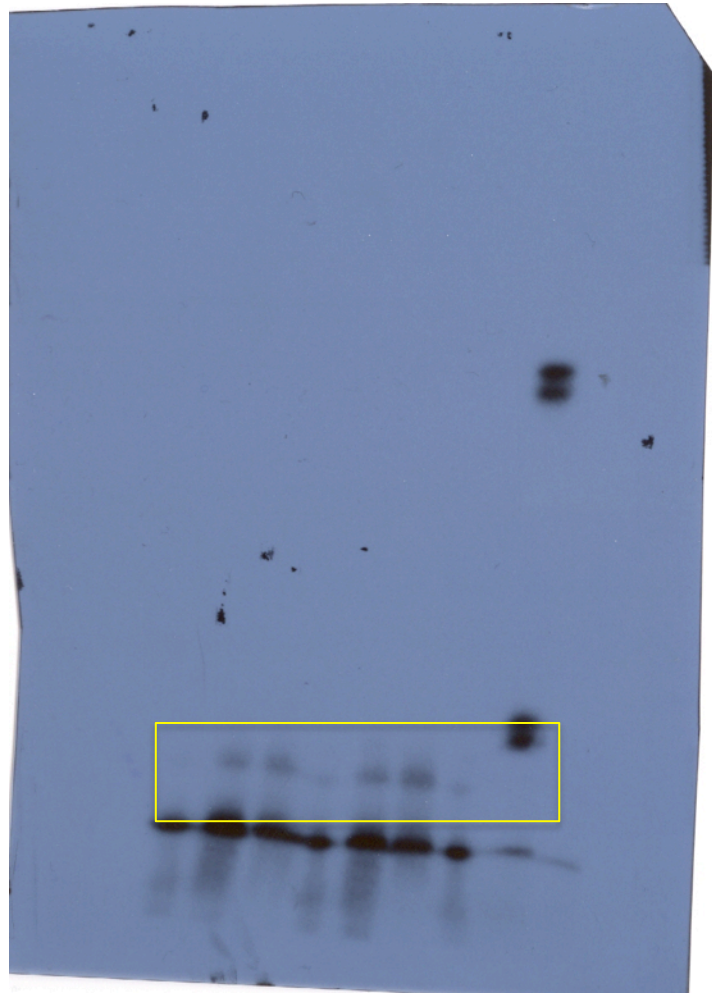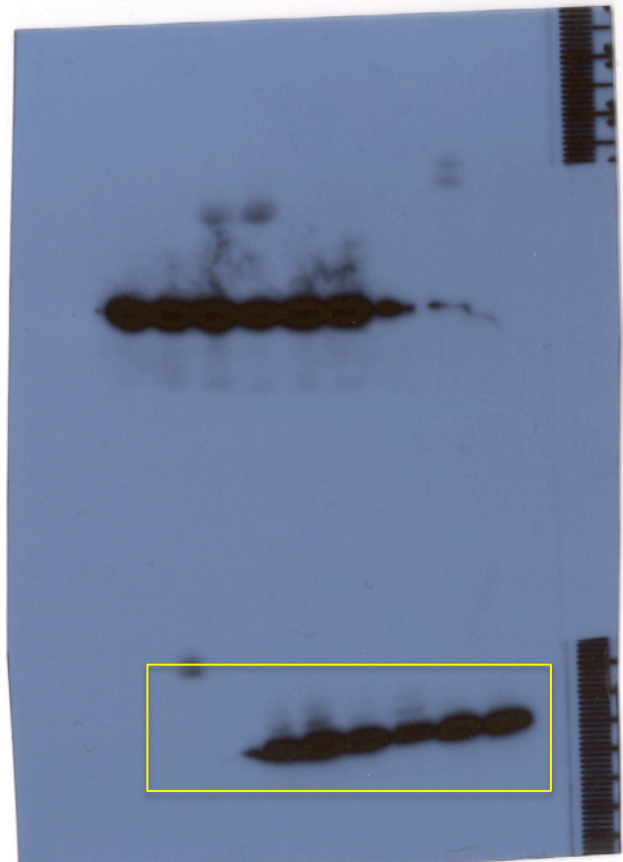

Figure 2H

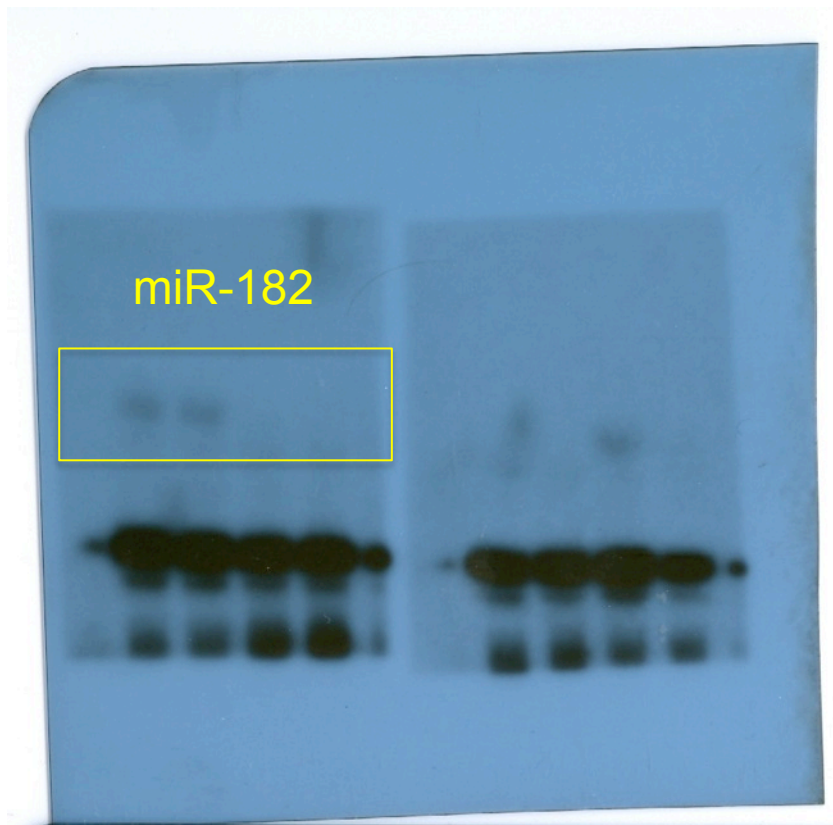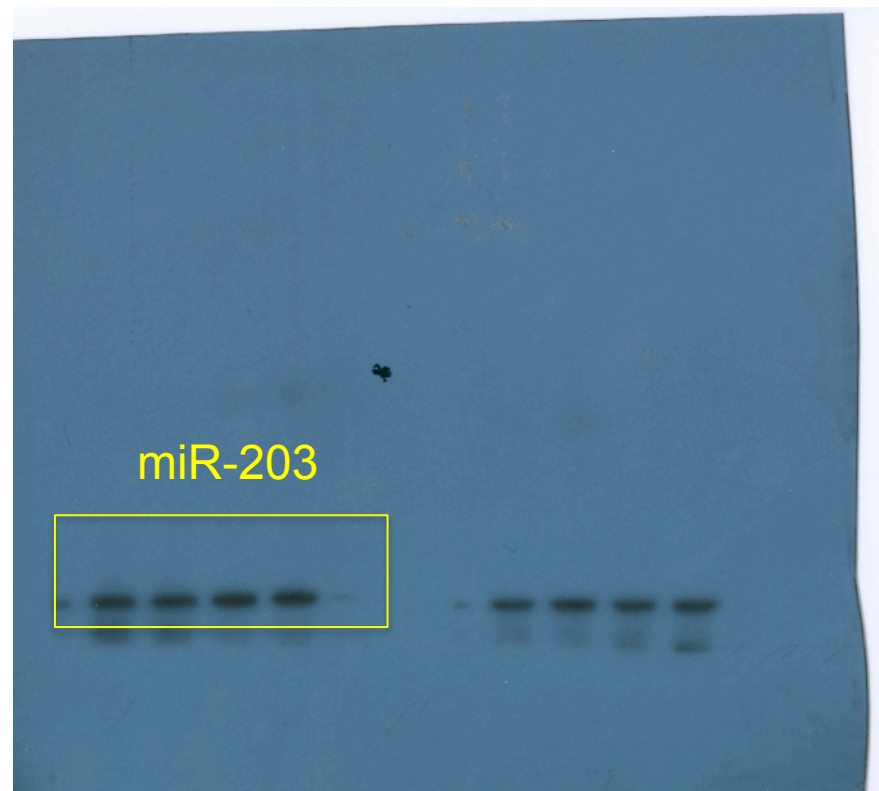

# Full unedited gel for Figure 3A

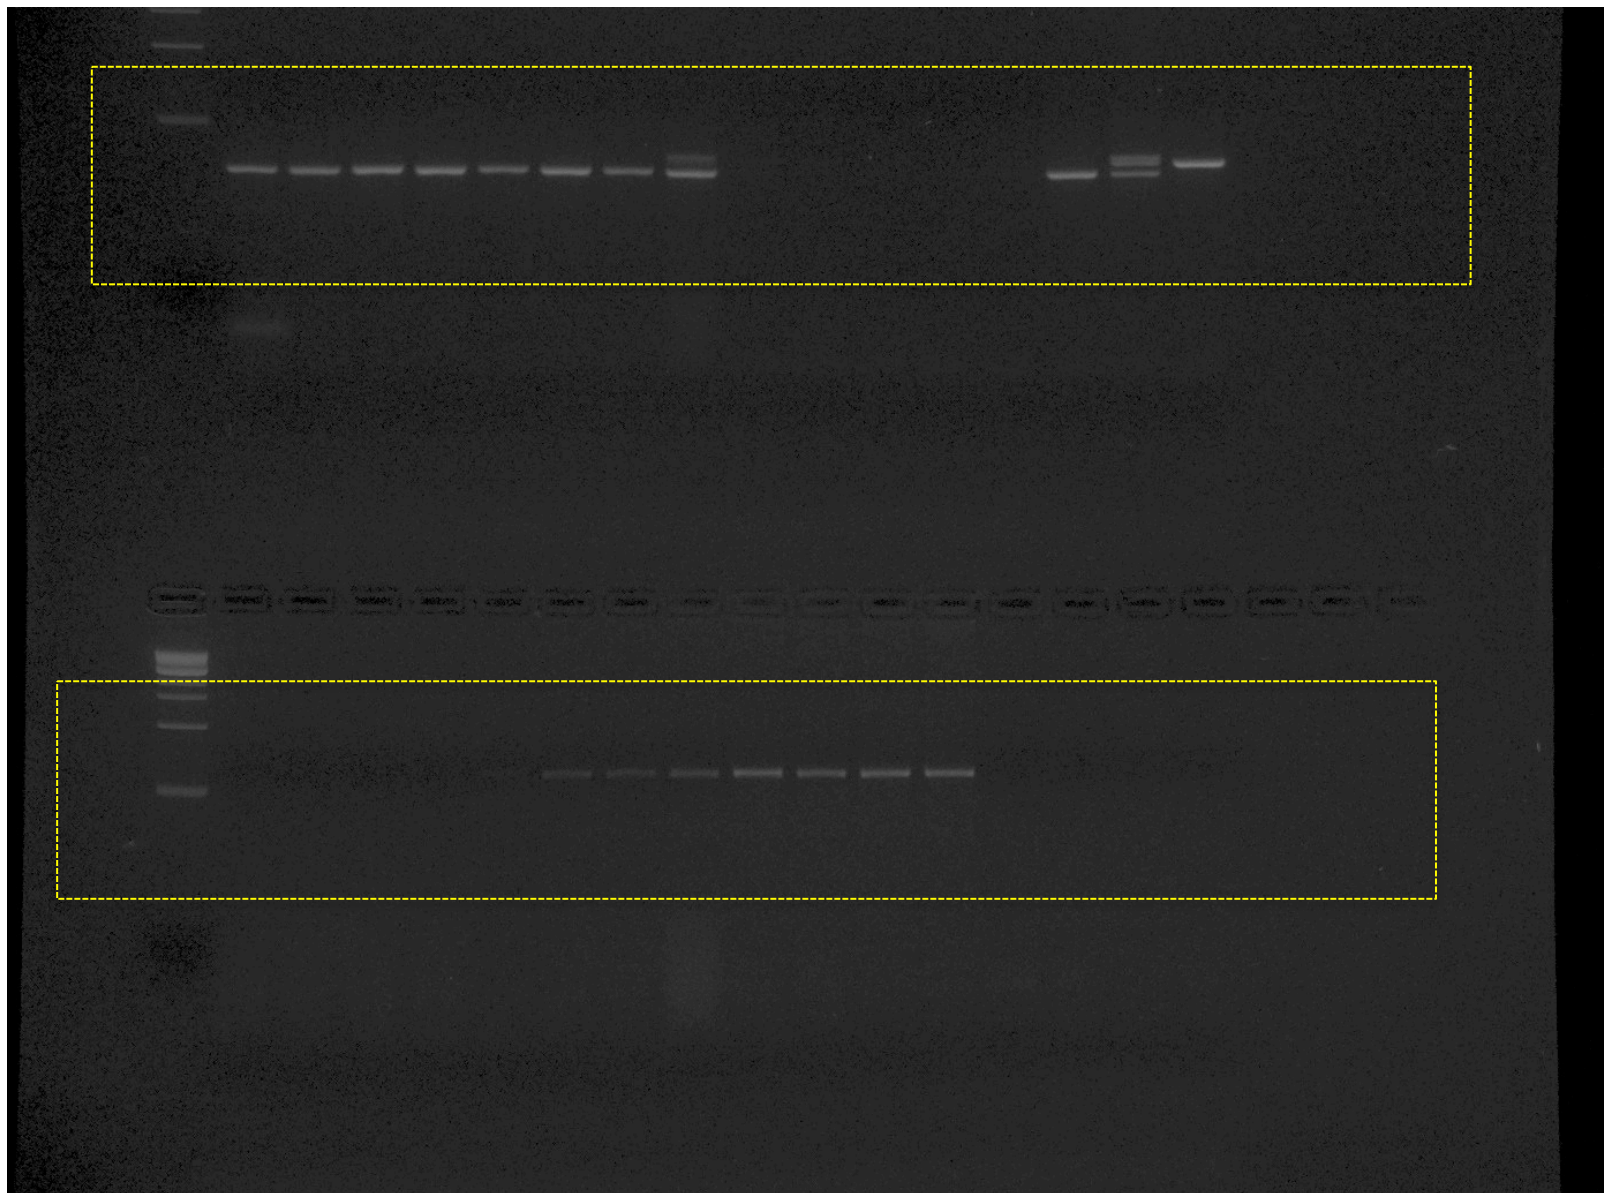

Full unedited gel for Figure 3C

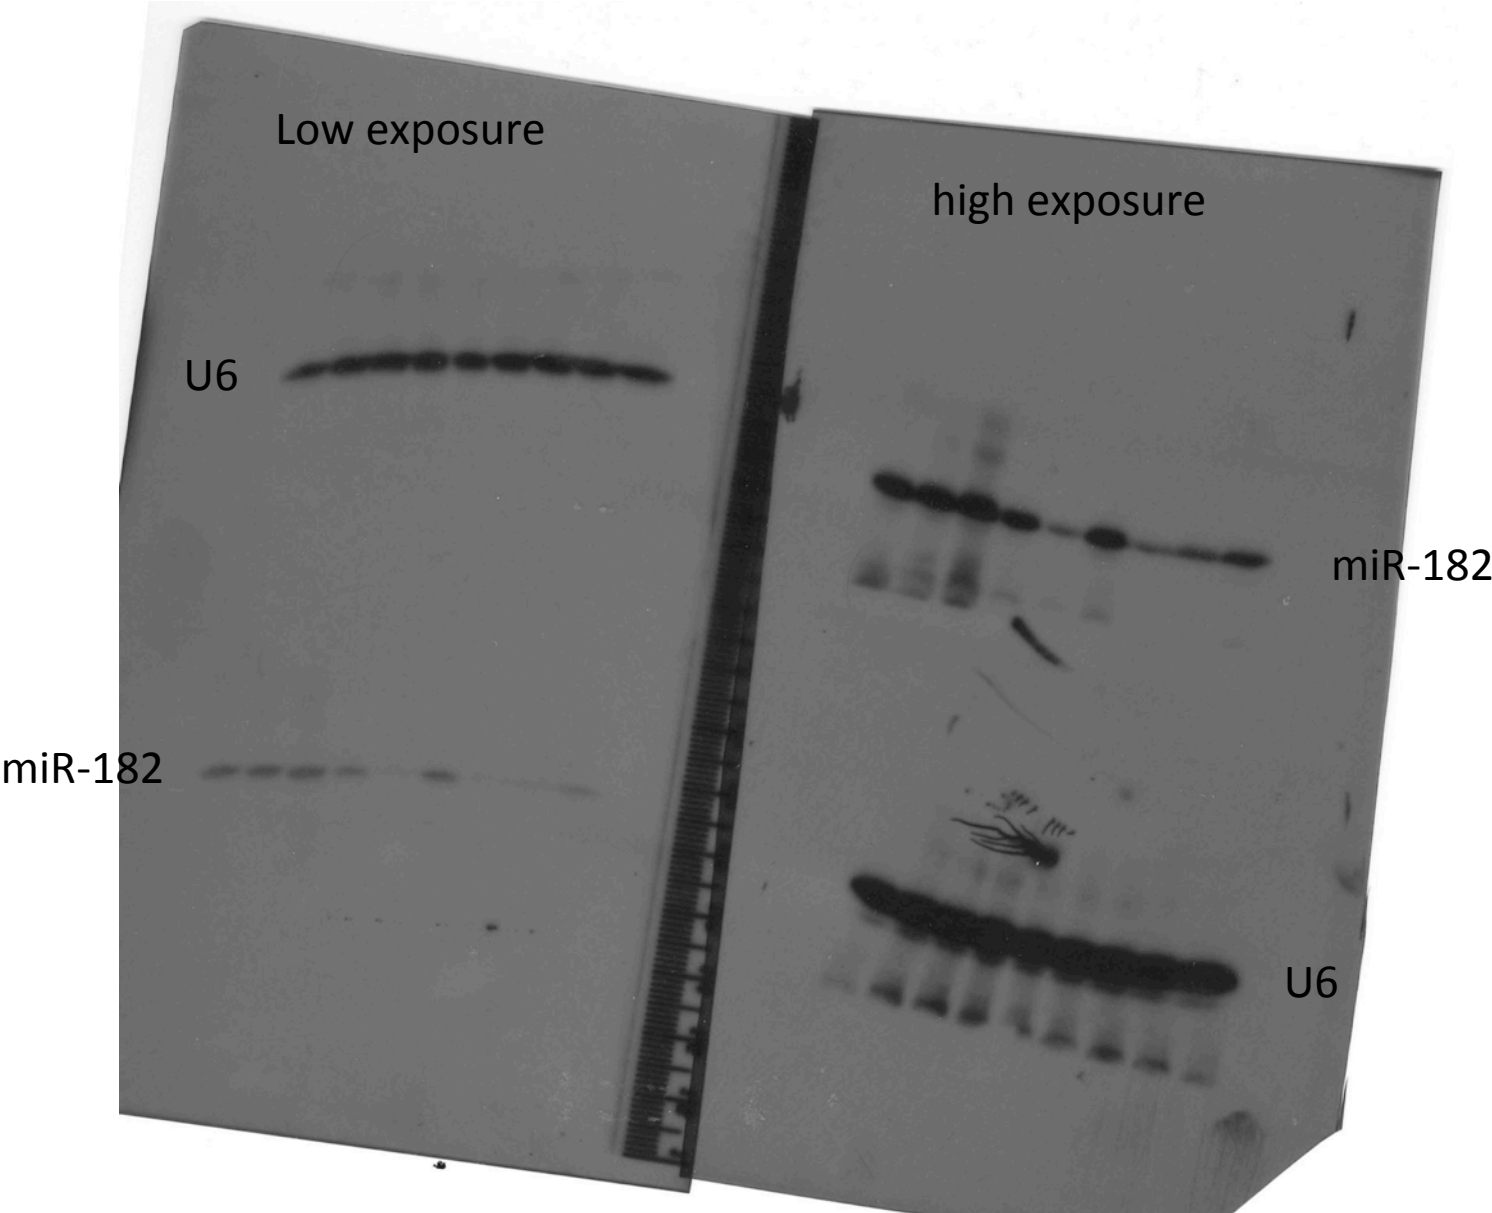



Figure 4A

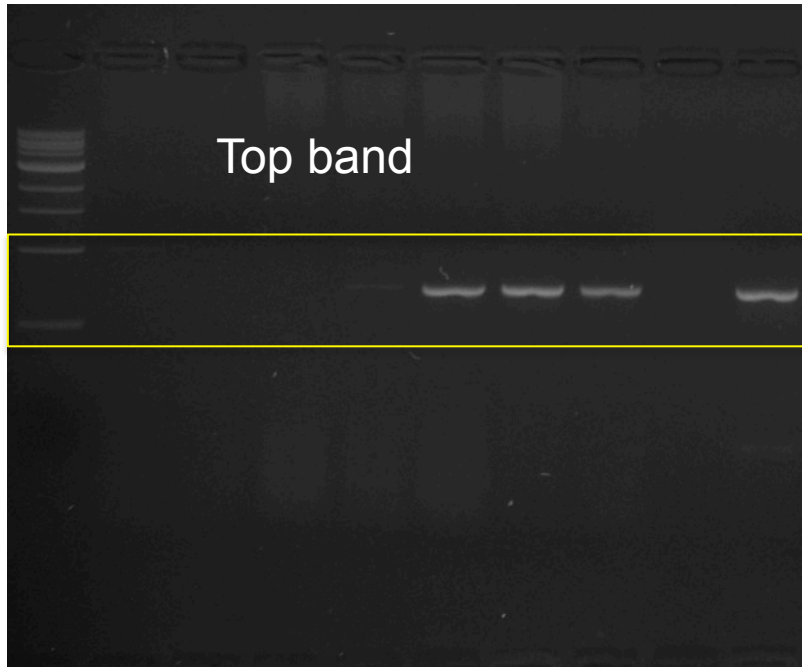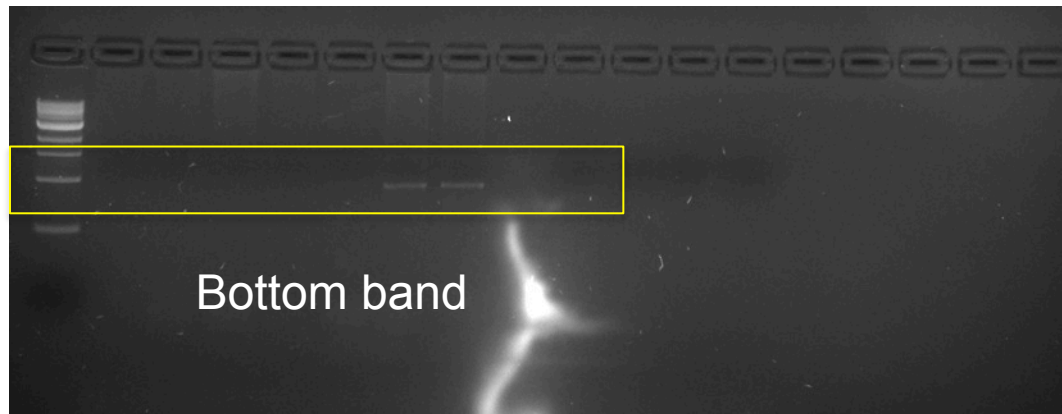

# Full unedited gel for Figure 4C

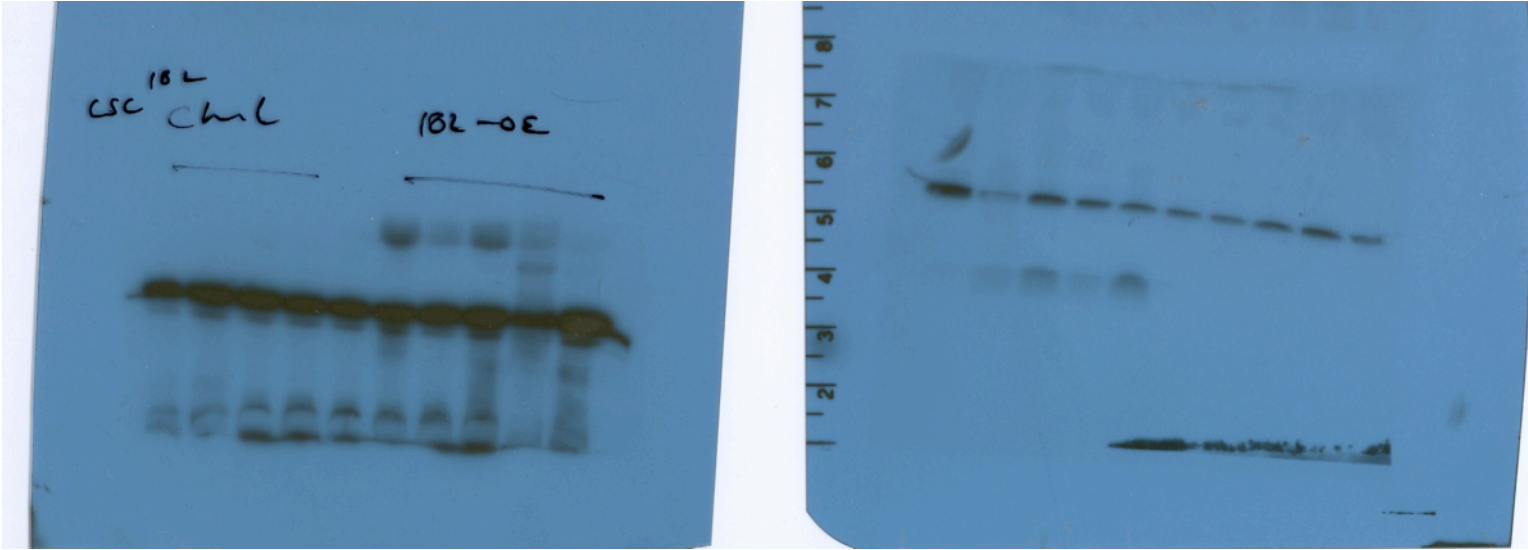

miR-182 5' lox-P

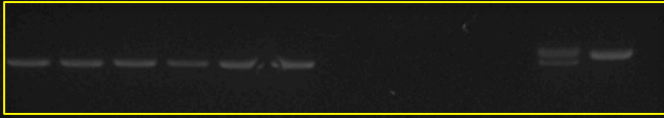

P53 recombined

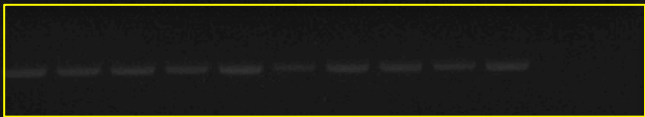

Figure 5G

miR-182 recombined

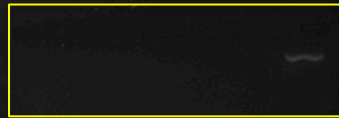

YFP

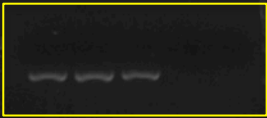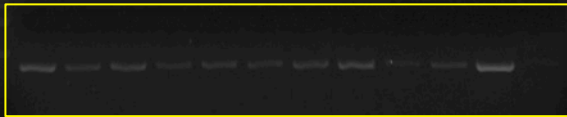

P53 5' lox-P

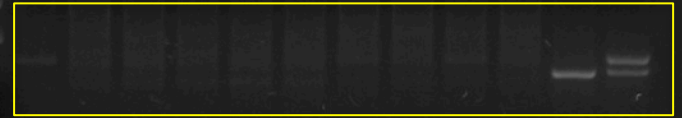

Kras

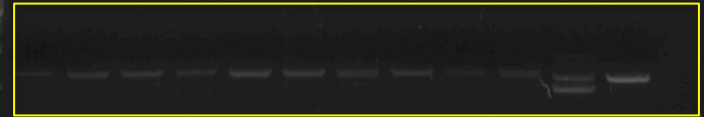

# Full unedited gel for Figure 6D

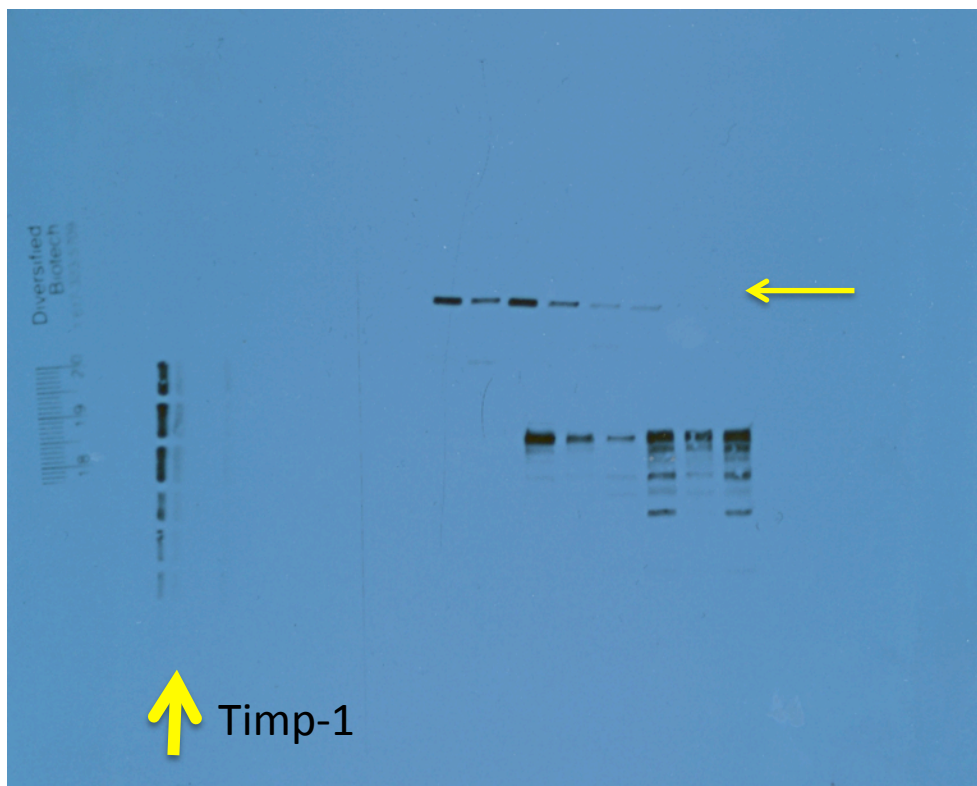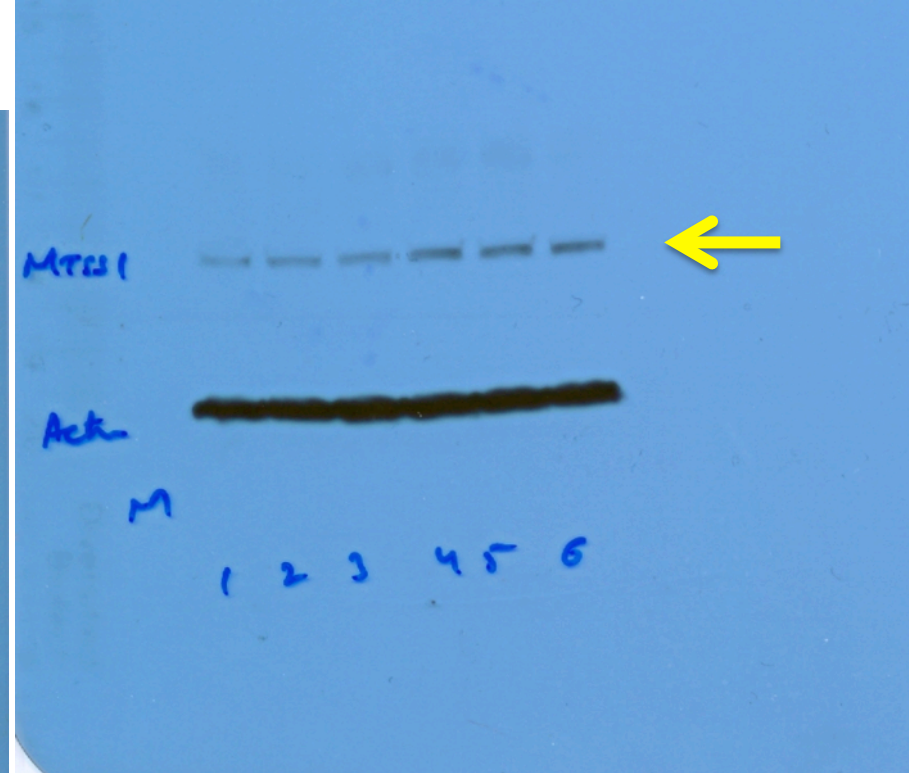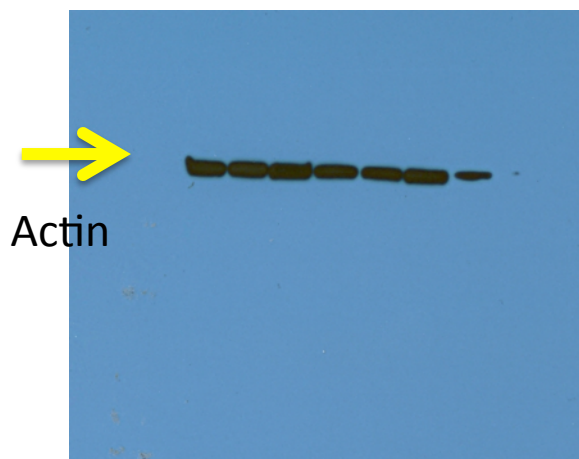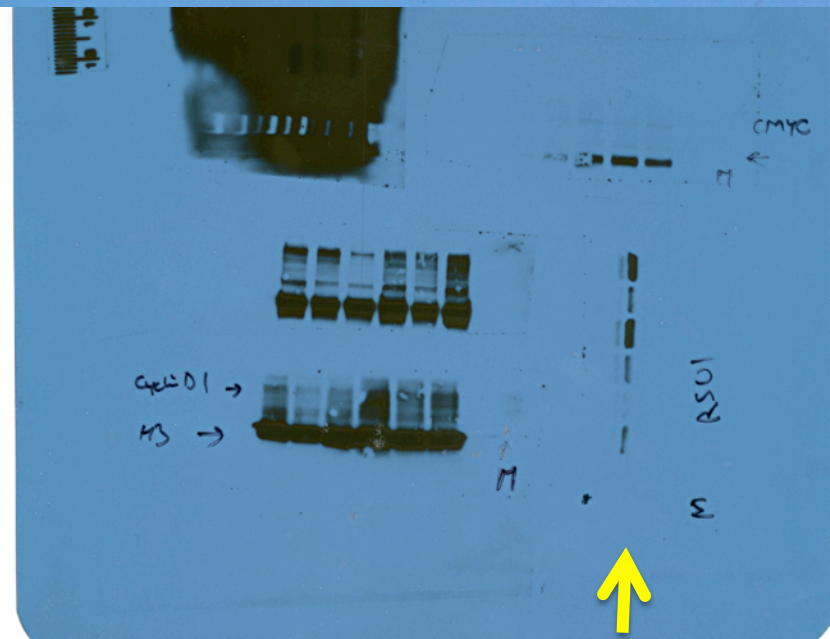

Full unedited gel for Figure 6F

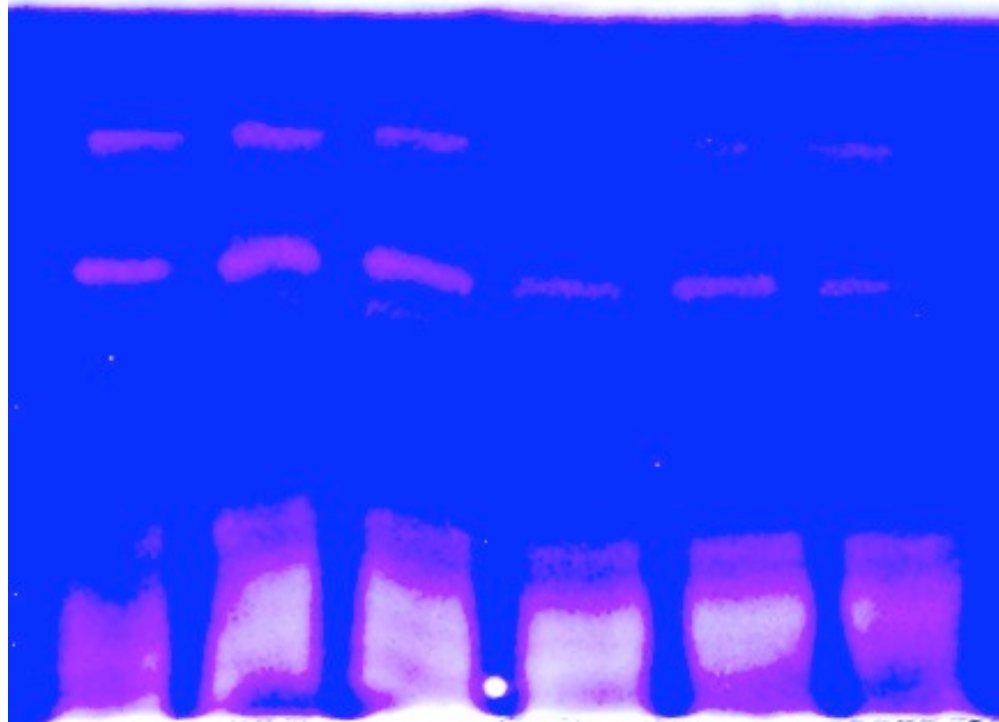

Supplement: JCI77116sd.pdf [file JCI77116sd.pdf]
